# Supplementary material for: Advances in mesenchymal stem cell therapy for immune and inflammatory diseases: Use of cell‐free products and human pluripotent stem cell‐derived mesenchymal stem cells
Source: PubMed Central journal article supplement (PMC8380447; doi:10.1002/sctm.21-0021), 2021-05-19
Supplement: SCT3-10-1288-s001.pdf [file SCT3-10-1288-s001.pdf]

Table S1: Clinical trials for GVHD &amp; transplant graft rejection using MSC-based products

| Condi-<br>tions | NCT<br>Numbe<br>r | Title                                                                                                                           | Status                        | Deliv<br>ery | Auto/<br>Allo? | Source<br>MSCs | Age                                | Phases                 | Enro<br>llme<br>nt | First<br>Posted | Publicati<br>ons               |
|-----------------|-------------------|---------------------------------------------------------------------------------------------------------------------------------|-------------------------------|--------------|----------------|----------------|------------------------------------|------------------------|--------------------|-----------------|--------------------------------|
| GVHD            | NCT00<br>136903   | Safety and Efficacy Study of Adult Human Mesenchymal Stem Cells to Treat Acute Graft Versus Host Disease (GVHD)                 | Comple<br>ted                 | IV           | Allo           | BMMSCs         | 18<br>Years to<br>70<br>Years      | Phase<br>2             | 33                 | 2005/8/29       |                                |
| GVHD            | NCT00<br>284986   | Safety and Efficacy of Prochymal for the Salvage of Treatment-Refractory Acute GVHD Patients                                    | Comple<br>ted                 | IV           | Allo           | BMMSCs         | 6<br>Months<br>to 70<br>Years      | Phase<br>2             | 15                 | 2006/2/1        |                                |
| GVHD            | NCT00<br>366145   | Efficacy and Safety of Adult Human Mesenchymal Stem Cells to Treat Steroid Refractory Acute Graft Versus Host Disease           | Comple<br>ted                 | IV           | Allo           | BMMSCs         | 6<br>Months<br>to 70<br>Years      | Phase<br>3             | 260                | 2006/8/21       | Kebriaei<br>2020 <sup>66</sup> |
| GVHD            | NCT00<br>603330   | Mesenchymal Stem Cell Infusion as Treatment for Steroid-Resistant Acute Graft Versus Host Disease (GVHD) or Poor Graft Function | Recruiti<br>ng                | IV           | UNS            | UNS            | Child,<br>Adult,<br>Older<br>Adult | Phase<br>2             | 100                | 2008/1/29       |                                |
| GVHD            | NCT00<br>826046   | Prochymal® Expanded Access for Adults Who Have Failed Steroid Treatment for Acute Graft Versus Host Disease (GVHD)              | No<br>longer<br>availabl<br>e | IV           | Allo           | BMMSCs         | 18<br>Years to<br>70<br>Years      | Not<br>Applic<br>able  |                    | 2009/1/21       |                                |
| GVHD            | NCT01<br>589549   | Mesenchymal Stromal Cells for Acute Graft Versus Host Disease                                                                   | Unkno<br>wn<br>status         | IV           | UNS            | UNS            | 18<br>Years to<br>55<br>Years      | Phase<br>2             | 66                 | 2012/5/2        |                                |
| GVHD            | NCT01<br>754454   | Safety and Efficacy of UC-MSC in Patients With Acute Severe Graft-versus-host Disease                                           | Unkno<br>wn<br>status         | IV           | Allo           | WJUCMS<br>Cs   | 18<br>Years to<br>70<br>Years      | Phase<br>1 Phas<br>e 2 | 30                 | 2012/12/21      |                                |
| GVHD            | NCT01<br>765634   | Mesenchymal Stem Cells for Treatment of Refractory Acute Graft-versus-host Disease                                              | Unkno<br>wn<br>status         | IV           | Allo           | BMMSCs         | 12<br>Years to<br>65<br>Years      | Phase<br>2             | 40                 | 2013/1/10       |                                |
| GVHD            | NCT01<br>941394   | Mesenchymal Stem Cells Infusion for aGVHD Prophylaxis Transplantation                                                           | Unkno<br>wn<br>status         | IV           | UNS            | UNS            | 18<br>Years to<br>60<br>Years      | Phase<br>2             | 70                 | 2013/9/13       |                                |
| GVHD            | NCT01<br>956903   | Treatment of Refractory Acute Graft-Versus-Host Disease by Sequential Infusion of Allogenic Mesenchymal Stem Cell.              | Comple<br>ted                 | IV           | Allo           | UNS            | 18<br>Years to<br>65<br>Years      | Phase<br>1 Phas<br>e 2 | 15                 | 2013/10/8       |                                |
| GVHD            | NCT02<br>241018   | MSCs Combined With CD25 Monoclonal Antibody and Calcineurin Inhibitors for Treatment of Steroid-resistant aGVHD                 | Unkno<br>wn<br>status         | UNS          | Allo           | BMMSCs         | 14<br>Years to<br>65<br>Years      | Phase<br>2 Phas<br>e 3 | 200                | 2014/9/16       |                                |
| GVHD            | NCT02<br>923375   | A Study of CYP-001 for the Treatment of Steroid-Resistant Acute Graft Versus Host Disease                                       | Comple<br>ted                 | IV           | Allo           | iPSC-<br>MSCs  | 18<br>Years to<br>70<br>Years      | Phase<br>1             | 16                 | 2016/10/4       | Bloor<br>2020 <sup>71</sup>    |

|      |             |                                                                                                                                                                                                      |                        |              |      |           |                           |                 |     |            |                              |
|------|-------------|------------------------------------------------------------------------------------------------------------------------------------------------------------------------------------------------------|------------------------|--------------|------|-----------|---------------------------|-----------------|-----|------------|------------------------------|
| GVHD | NCT02336230 | A Prospective Study of Remestemcel-L, Ex-vivo Cultured Adult Human Mesenchymal Stromal Cells, for the Treatment of Pediatric Patients Who Have Failed to Respond to Steroid Treatment for Acute GVHD | Completed              | IV           | Allo | BMMSCs    | 2 Months to 17 Years      | Phase 3         | 55  | 2015/1/12  | Kurtzberg 2020 <sup>67</sup> |
| GVHD | NCT02379442 | Early Treatment of Acute Graft Versus Host Disease With Bone Marrow-Derived Mesenchymal Stem Cells and Corticosteroids                                                                               | Terminated             | IV           | Allo | BMMSCs    | 4 Years to 99 Years       | Phase 1 Phase 2 | 1   | 2015/3/5   |                              |
| GVHD | NCT02687646 | Clinical Trial With MSC for Graft Versus Host Disease Treatment                                                                                                                                      | Recruiting             | IV           | Allo | AdMSCs    | 18 Years to 65 Years      | Phase 1 Phase 2 | 15  | 2016/2/22  |                              |
| GVHD | NCT03158896 | Evaluation of Umbilical Cord-Derived Wharton's Jelly Stem Cells for the Treatment of Acute Graft Versus Host Disease                                                                                 | Active, not recruiting | UNS          | Allo | WJUCMS Cs | 18 Years to 75 Years      | Phase 1         | 10  | 2017/5/18  |                              |
| GVHD | NCT04328714 | Interferon $\gamma$ -Primed Mesenchymal Stromal Cells as Prophylaxis for Acute Graft v Host Disease                                                                                                  | Not yet recruiting     | IV           | Allo | BMMSCs    | 1 Year and older          | Phase 1         | 45  | 2020/3/31  |                              |
| GVHD | NCT02770430 | Mesenchymal Stem Cells as First Treatment Line for Resistant Acute Graft Versus Host Disease                                                                                                         | Unknown status         | IV           | UNS  | BMMSCs    | Child, Adult, Older Adult | Phase 2         | 90  | 2016/5/12  |                              |
| GVHD | NCT03631589 | MSC for Severe aGVHD                                                                                                                                                                                 | Recruiting             | UNS          | UNS  | UNS       | up to 65 Years            | Phase 2 Phase 3 | 50  | 2018/8/15  |                              |
| GVHD | NCT03847844 | UCMSCs as Front-line Approach of Treatment for Patients With aGVHD                                                                                                                                   | Recruiting             | UNS          | Allo | WJUCMS Cs | 16 Years and older        | Phase 1 Phase 2 | 40  | 2019/2/20  |                              |
| GVHD | NCT00972660 | Safety and Efficacy Study of Allogenic Mesenchymal Stem Cells to Treat Extensive Chronic Graft Versus Host Disease                                                                                   | Unknown status         | IV           | Allo | UNS       | Child, Adult, Older Adult | Phase 2         | 52  | 2009/9/7   |                              |
| GVHD | NCT01222039 | Multicenter Clinical Trial for the Evaluation of Mesenchymal Stem Cells From Adipose Tissue in Patients With Chronic Graft Versus Host Disease.                                                      | Completed              | IV           | Allo | AdMSCs    | 18 Years to 65 Years      | Phase 1 Phase 2 | 19  | 2010/10/18 |                              |
| GVHD | NCT01522716 | Mesenchymal Stromal Cells as Treatment of Chronic Graft-versus-host Disease                                                                                                                          | Unknown status         | IV           | Allo | BMMSCs    | 18 Years and older        | Phase 1         | 11  | 2012/2/1   | Boberg 2020 <sup>65</sup>    |
| GVHD | NCT01526850 | Efficacy and Safety Study of Allogenic Mesenchymal Stem Cells for Patients With Chronic Graft Versus Host Disease                                                                                    | Unknown status         | BM injection | Allo | UNS       | 2 Years to 60 Years       | Phase 2 Phase 3 | 100 | 2012/2/6   |                              |
| GVHD | NCT01765660 | Mesenchymal Stem Cells for Treatment of Refractory Chronic Graft-versus-host Disease                                                                                                                 | Unknown status         | IV           | Allo | BMMSCs    | 12 Years to 65 Years      | Phase 2         | 60  | 2013/1/10  |                              |
| GVHD | NCT02291770 | Treatment of Chronic Graft-Versus-Host Disease With Mesenchymal Stromal Cells                                                                                                                        | Unknown status         | IV           | UNS  | UNS       | 14 Years to 65 Years      | Phase 3         | 130 | 2014/11/14 |                              |

|      |             |                                                                                                                                                         |                |                    |      |                  |                           |                 |    |            |                                |
|------|-------------|---------------------------------------------------------------------------------------------------------------------------------------------------------|----------------|--------------------|------|------------------|---------------------------|-----------------|----|------------|--------------------------------|
| GVHD | NCT04213248 | Effect of UMSCs Derived Exosomes on Dry Eye in Patients With cGVHD                                                                                      | Recruiting     | On eye             | Allo | WJUCMS C-exosome | 18 Years to 70 Years      | Phase 1 Phase 2 | 27 | 2019/12/30 |                                |
| GVHD | NCT00314483 | Evaluation of the Role of Mesenchymal Stem Cells in the Treatment of Graft Versus Host Disease                                                          | Unknown status | IV                 | UNS  | UNS              | 2 Years to 60 Years       | Phase 1 Phase 2 | 25 | 2006/4/14  |                                |
| GVHD | NCT00361049 | Donor Mesenchymal Stem Cell Infusion in Treating Patients With Acute or Chronic Graft-Versus-Host Disease After Undergoing a Donor Stem Cell Transplant | Completed      | IV                 | Allo | UNS              | 18 Years and older        | Phase 1         | 49 | 2006/8/7   |                                |
| GVHD | NCT00447460 | Treatment of Refractory (Acute or Chronic) Graft-Versus-Host Disease by the Infusion of Expanded in-Vitro Allogenic Mesenchymal Stem Cell               | Unknown status | IV                 | Allo | BMMSCs           | 18 Years to 65 Years      | Phase 1 Phase 2 | 15 | 2007/3/14  | Pérez-Simon 2011 <sup>63</sup> |
| GVHD | NCT00749164 | Allogeneic Mesenchymal Stem Cell for Graft-Versus-Host Disease Treatment                                                                                | Unknown status | IV                 | Allo | WJUCMS Cs        | Child, Adult, Older Adult | Phase 1 Phase 2 | 20 | 2008/9/9   |                                |
| GVHD | NCT00827398 | Treatment of Steroid Resistant GVHD by Infusion MSC                                                                                                     | Completed      | IV                 | UNS  | UNS              | 1 Month to 68 Years       | Phase 1 Phase 2 | 50 | 2009/1/22  |                                |
| GVHD | NCT01318330 | Safety Study of Homeo-GH (Bone Marrow Derived Clonal Mesenchymal Stem Cell) to Treat Acute/Chronic Graft Versus Host Disease (GVHD)                     | Completed      | IV                 | Allo | BMMSCs           | 18 Years and older        | Phase 1         | 10 | 2011/3/18  |                                |
| GVHD | NCT01549665 | Umbilical Cord Blood-derived Mesenchymal Stem Cells for the Treatment of Steroid-refractory Acute or Chronic Graft-versus-host-disease                  | Unknown status | IV                 | Allo | UCBMS Cs         | up to 30 Years            | Phase 1 Phase 2 | 30 | 2012/3/9   |                                |
| GVHD | NCT01764100 | Mesenchymal Stromal Cells (MSCs) for the Treatment of Graft Versus Host Disease (GVHD)                                                                  | Unknown status | IV                 | Allo | BMMSCs           | Child, Adult, Older Adult | Phase 1         | 10 | 2013/1/9   | Introna 2014 <sup>64</sup>     |
| GVHD | NCT02032446 | Umbilical Cord Derived Mesenchymal Stromal Cells For The Treatment of Severe Steroid-resistant Graft Versus Host Disease                                | Recruiting     | IV                 | Allo | WJUCMS Cs        | up to 70 Years            | Phase 1 Phase 2 | 47 | 2014/1/10  |                                |
| GVHD | NCT02055625 | Mesenchymal Stem Cells as a Treatment for Oral Complications of Graft-versus-host Disease                                                               | Withdrawn      | On mucosal lesions | UNS  | UNS              | 18 Years to 80 Years      | Phase 1 Phase 2 | 0  | 2014/2/5   |                                |
| GVHD | NCT02359929 | BMT Autologous MSCs for GvHD                                                                                                                            | Recruiting     | IV                 | Auto | BMMSCs           | 12 Years and older        | Phase 1         | 24 | 2015/2/10  |                                |
| GVHD | NCT02824653 | Allogenic Bone Marrow Mesenchymal Stem Cells Infusion in Patients With Steroid-refractory GVHD                                                          | Completed      | IV                 | Allo | BMMSCs           | 1 Year to 65 Years        | Phase 1 Phase 2 | 10 | 2016/7/7   |                                |

|                |             |                                                                                                                                                        |                     |             |      |         |                      |                 |           |                                     |
|----------------|-------------|--------------------------------------------------------------------------------------------------------------------------------------------------------|---------------------|-------------|------|---------|----------------------|-----------------|-----------|-------------------------------------|
| GVHD           | NCT00759018 | Prochymal Expanded Access Treatment for Pediatric Patients Who Have Failed Steroids for Acute GVHD                                                     | No longer available | IV          | Allo | BMMSCs  | 2 Months to 17 Years | Not Applicable  | 2008/9/25 | Kurtzberg 2020 <sup>68</sup>        |
| GVHD           | NCT04629833 | Treatment Of Steroid-Refractory Acute Graft-versus-host Disease With Mesenchymal Stromal Cells Versus Best Available Therapy                           | Not yet recruiting  | IV          | Allo | BMMSCs  | 12 Years and older   | Phase 3         | 210       | 2020/11/16                          |
| GVHD           | NCT04744116 | Addition of Cord Blood Tissue-Derived Mesenchymal Stromal Cells to Ruxolitinib for the Treatment of Steroid-Refractory Acute Graft Versus Host Disease | Not yet recruiting  | IV          | Allo | UCBMSCs | 12 Years to 80 Years | Early Phase 1   | 24        | 2021/2/8                            |
| GVHD           | NCT04692376 | MSC for Treatment of cGVHD After Allo-HSCT                                                                                                             | Recruiting          | IV          | UNS  | UNS     | 65 Years to 18 Years | Phase 2         | 152       | 2020/12/31                          |
| BMT            | NCT02270307 | MSC and Cyclophosphamide for Acute Graft-Versus-Host Disease (aGVHD) Prophylaxis                                                                       | Unknown status      | Unspecified | UNS  | UNS     | 18 Years to 65 Years | Phase 2 Phase 3 | 40        | 2014/10/21                          |
| BMT            | NCT01061099 | Repeated Infusions of Mesenchymal Stromal Cells in Children With Osteogenesis Imperfecta                                                               | Completed           | IV          | Allo | BMMSCs  | up to 19 Years       | Phase 1         | 5         | 2010/2/2                            |
| BMT            | NCT02582775 | MT2015-20: Biochemical Correction of Severe EB by Allo HSCT and Serial Donor MSCs                                                                      | Recruiting          | IV          | Allo | UNS     | up to 25 Years       | Phase 2         | 84        | 2015/10/21 Ebens 2019 <sup>70</sup> |
| HSC transplant | NCT03106662 | Mesenchymal Stem Cell Infusion in Haploidentical Hematopoietic Stem Cell Transplantation in Patients With Hematological Malignancies                   | Completed           | IV          | UNS  | UNS     | 18 Years and older   | Phase 3         | 6         | 2017/4/10                           |
| HSC transplant | NCT01045382 | MSC and HSC Coinfusion in Mismatched Minitransplants                                                                                                   | Recruiting          | IV          | UNS  | UNS     | up to 75 Years       | Phase 2         | 120       | 2010/1/11                           |
| HSC transplant | NCT01092026 | Unrelated Umbilical Cord Blood Transplantation With Coinfusion of Mesenchymal Stem Cells                                                               | Unknown status      | IV          | Allo | UNS     | 15 Years to 60 Years | Phase 1 Phase 2 | 20        | 2010/3/24                           |
| HSC transplant | NCT01763086 | Mesenchymal Stem Cells for Treatment of Poor Graft Function After Allogeneic Hematopoietic Stem Cell Transplant                                        | Unknown status      | IV          | Allo | BMMSCs  | 14 Years to 65 Years | Phase 2         | 60        | 2013/1/8                            |
| HSC transplant | NCT01763099 | Mesenchymal Stem Cells Combined With Cord Blood for Treatment of Graft Failure                                                                         | Unknown status      | IV          | Allo | BMMSCs  | 14 Years to 65 Years | Phase 2         | 60        | 2013/1/8                            |
| HSC transplant | NCT02083718 | Peripheral Blood Stem Cell Combined With Mesenchymal Stem Cells for Treatment of Poor Graft Function                                                   | Unknown status      | IV          | Allo | BMMSCs  | 14 Years to 65 Years | Phase 2         | 120       | 2014/3/11                           |

|                  |             |                                                                                                                                                             |                        |     |                           |                 |                      |                      |                 |          |            |                          |
|------------------|-------------|-------------------------------------------------------------------------------------------------------------------------------------------------------------|------------------------|-----|---------------------------|-----------------|----------------------|----------------------|-----------------|----------|------------|--------------------------|
| HSC transplant   | NCT02104440 | Clinical Trial In The Treatment Of Allogeneic Post-Transplant Cytopenias With Sequential Infusion Of Allogeneic Mesenchymal Cells Expanded In Vitro         | Completed              | UNS | Allo                      | UNS             | 18 Years to 70 Years | Phase 2              | 15              | 2014/4/4 |            |                          |
| HSC transplant   | NCT02181478 | Intra-Osseous Co-Transplant of UCB and hMSC                                                                                                                 | Active, not recruiting |     | Intraosseous Injection    | UNS             | UNS                  | 18 Years to 75 Years | Early Phase 1   | 6        | 2014/7/4   |                          |
| HSC transplant   | NCT02240992 | MSCs With or Without Peripheral Blood Stem Cell for Treatment of Poor Graft Function and Delayed Platelet Engraftment                                       | Unknown status         | IV  |                           | UNS             | UNS                  | 14 Years to 65 Years | Phase 2 Phase 3 | 120      | 2014/9/16  |                          |
| HSC transplant   | NCT02247973 | Mesenchymal Stem Cells Co-transplantation in Alternative Donor Transplantation of Severe Aplastic Anemia.                                                   | Unknown status         | IV  | Allo                      | BMMSCs          |                      | 14 Years to 50 Years | Phase 2         | 100      | 2014/9/25  |                          |
| HSC transplant   | NCT03298399 | Mesenchymal Stromal Cells for Haplo Hematopoietic Cell Transplantation for Sickle Cell Disease                                                              | Withdrawn              | IV  | Auto                      | BMMSCs          |                      | 12 Years to 40 Years | Phase 1         | 0        | 2017/10/2  |                          |
| HSC transplant   | NCT03389919 | Intraosseous Administration of Mesenchymal Stromal Cells for Patients With Graft Failure After Allo-HSCT                                                    | Recruiting             |     | Intraosseous Injection    | UNS             | UNS                  | 18 Years and older   | Phase 3         | 20       | 2018/1/4   |                          |
| HSC transplant   | NCT04247945 | Co-transplantation of MSC in the Setting of Allo-HSCT                                                                                                       | Recruiting             | IV  |                           | UNS             | UNS                  | up to 65 Years       | Phase 2 Phase 3 | 120      | 2020/1/30  |                          |
| HSC transplant   | NCT01033552 | Biochemical Correction of Severe EB by Allo HSCT and "Off-the-shelf" MSCs                                                                                   | Recruiting             | IV  | Allo                      | BMMSCs /UCBMSCs |                      | up to 25 Years       | Phase 2         | 75       | 2009/12/16 |                          |
| HSC transplant   | NCT02407470 | Safety and Efficacy of Patient's Own AD-MSC and AD-HSC Transplantation in Patients With Severe Aplastic Anemia                                              | Unknown status         | IV  | Auto                      | AdMSCs          |                      | 14 Years to 70 Years | Phase 1 Phase 2 | 90       | 2015/4/3   |                          |
| HSC transplant   | NCT00504803 | Mesenchymal Stem Cell Infusion as Prevention for Graft Rejection and Graft-versus-host Disease                                                              | Completed              | IV  | Allo                      | BMMSCs          |                      | up to 75 Years       | Phase 2         | 30       | 2007/7/20  | Baron 2010 <sup>69</sup> |
| HSC transplant   | NCT00823316 | Safety and Efficacy Study of Umbilical Cord Blood-Driven Mesenchymal Stem Cells to Promote Engraftment of Unrelated Hematopoietic Stem Cell Transplantation | Completed              | IV  | Allo                      | UCBMSCs         |                      | 2 Years to 19 Years  | Phase 1 Phase 2 | 10       | 2009/1/15  |                          |
| Heart transplant | NCT02472002 | Mesenchymal Stem Cell Administration in the Treatment of Coronary Graft Disease in Heart Transplant Patients                                                | Suspended              |     | Intramyocardial injection | Auto            | BMMSCs               | 18 Years to 80 Years | Phase 1 Phase 2 | 14       | 2015/6/15  |                          |
| Islet transplant | NCT02384018 | Mesenchymal Stem Cell and Islet Co-transplantation                                                                                                          | Active, not recruiting | UNS | Auto                      | BMMSCs          |                      | 18 Years to 69 Years | Phase 1         | 24       | 2015/3/10  | Wang 2018 <sup>78</sup>  |

|                   |             |                                                                                                                                                                          |                |     |           |           |                      |                 |     |            |                                                                                         |
|-------------------|-------------|--------------------------------------------------------------------------------------------------------------------------------------------------------------------------|----------------|-----|-----------|-----------|----------------------|-----------------|-----|------------|-----------------------------------------------------------------------------------------|
| Islet transplant  | NCT00646724 | Cotransplantation of Islet and Mesenchymal Stem Cell in Type 1 Diabetic Patients                                                                                         | Unknown status | UNS | Auto      | UNS       | 18 Years to 60 Years | Phase 1 Phase 2 | 30  | 2008/3/28  |                                                                                         |
| Kidney transplant | NCT02492308 | Induction With SVF Derived MSC in Living-related Kidney Transplantation                                                                                                  | Unknown status | IV  | Auto      | AdMSCs    | 18 Years to 60 Years | Phase 1 Phase 2 | 120 | 2015/7/8   |                                                                                         |
| Kidney transplant | NCT00658073 | Induction Therapy With Autologous Mesenchymal Stem Cells for Kidney Allografts                                                                                           | Completed      | IV  | Auto      | BMMSCs    | 18 Years to 60 Years | Not Applicable  | 165 | 2008/4/14  | Tan 2012 <sup>73</sup>                                                                  |
| Kidney transplant | NCT00659620 | Mesenchymal Stem Cell Transplantation in the Treatment of Chronic Allograft Nephropathy                                                                                  | Unknown status | IV  | UNS       | UNS       | 18 Years to 60 Years | Phase 1 Phase 2 | 20  | 2008/4/16  |                                                                                         |
| Kidney transplant | NCT00734396 | Mesenchymal Stem Cells and Subclinical Rejection                                                                                                                         | Completed      | IV  | Auto      | BMMSCs    | 18 Years to 65 Years | Phase 1 Phase 2 | 15  | 2008/8/14  | Reinders 2013 <sup>75</sup>                                                             |
| Kidney transplant | NCT00752479 | Mesenchymal Stem Cells Under Basiliximab/Low Dose RATG to Induce Renal Transplant Tolerance                                                                              | Terminated     | IV  | Auto      | BMMSCs    | 18 Years to 80 Years | Phase 1 Phase 2 | 4   | 2008/9/15  | Perico 2011 <sup>72</sup> ,<br>Perico 2013 <sup>74</sup> ,<br>Perico 2018 <sup>77</sup> |
| Kidney transplant | NCT02012153 | Mesenchymal Stromal Cells in Kidney Transplant Recipients                                                                                                                | Recruiting     | IV  | Auto      | BMMSCs    | 18 Years and older   | Phase 1         | 6   | 2013/12/16 | Perico 2018 <sup>77</sup>                                                               |
| Kidney transplant | NCT02057965 | Mesenchymal Stromal Cell Therapy in Renal Recipients                                                                                                                     | Recruiting     | IV  | Auto      | BMMSCs    | 18 Years to 75 Years | Phase 2         | 70  | 2014/2/7   | Reinders 2014 <sup>76</sup>                                                             |
| Kidney transplant | NCT02387151 | Allogeneic Mesenchymal Stromal Cell Therapy in Renal Transplant Recipients                                                                                               | Completed      | IV  | Allo      | BMMSCs    | 18 Years to 75 Years | Phase 1         | 10  | 2015/3/12  | Reinders 2015 <sup>79</sup>                                                             |
| Kidney transplant | NCT02409940 | To Elucidate the Effect of Mesenchymal Stem Cells on the T Cell Repertoire of the Kidney Transplant Patients                                                             | Unknown status | IV  | Auto/Allo | BMMSCs    | 18 Years to 65 Years | Phase 1         | 17  | 2015/4/7   |                                                                                         |
| Kidney transplant | NCT02490020 | A Perspective Multicenter Controlled Study On Application Of Mesenchymal Stem Cell(MSC) To Prevent Rejection After Renal Transplantation By Donation After Cardiac Death | Unknown status | IV  | Allo      | WJUCMS Cs | 18 Years to 60 Years | Phase 1         | 260 | 2015/7/3   | Sun 2018 <sup>80</sup> ,<br>Sun 2017 <sup>81</sup>                                      |
| Kidney transplant | NCT02492490 | Effect of SVF Derived MSC in DCD Renal Transplantation                                                                                                                   | Unknown status | IV  | Auto      | AdMSCs    | 18 Years to 60 Years | Phase 1 Phase 2 | 120 | 2015/7/8   |                                                                                         |
| Kidney transplant | NCT02561767 | Effect of BM-MSCs in DCD Kidney Transplantation                                                                                                                          | Unknown status | IV  | Allo      | BMMSCs    | 18 Years to 65 Years | Phase 1 Phase 2 | 120 | 2015/9/28  |                                                                                         |
| Kidney transplant | NCT02563340 | Effect of BM-MSCs on Chronic AMR After Kidney Transplantation                                                                                                            | Unknown status | IV  | Allo      | BMMSCs    | 18 Years to 65 Years | Phase 1 Phase 2 | 60  | 2015/9/30  |                                                                                         |

|                         |             |                                                                                                                                                                                       |                    |                                                       |      |          |                      |                 |     |           |                          |
|-------------------------|-------------|---------------------------------------------------------------------------------------------------------------------------------------------------------------------------------------|--------------------|-------------------------------------------------------|------|----------|----------------------|-----------------|-----|-----------|--------------------------|
| Kidney transplant       | NCT02563366 | Effect of BM-MSCs on Early Graft Function Recovery After DCD Kidney Transplant.                                                                                                       | Unknown status     | IV                                                    | Allo | BMMSCs   | 18 Years to 65 Years | Phase 1 Phase 2 | 120 | 2015/9/30 |                          |
| Kidney transplant       | NCT03478215 | Mesenchymal Stromal Cells in Living Donor Kidney Transplantation                                                                                                                      | Recruiting         | IV                                                    | Auto | UNS      | 18 Years to 65 Years | Phase 2         | 24  | 2018/3/27 |                          |
| Kidney transplant       | NCT03504241 | Tolerance by Engaging Antigen During Cellular Homeostasis                                                                                                                             | Recruiting         | IV                                                    | Allo | BMMSCs   | 19 Years and older   | Phase 1         | 6   | 2018/4/20 |                          |
| Kidney transplant       | NCT03585855 | Mesenchymal Stem Cell Transplantation in the Treatment of Chronic Antibody Mediated Kidney Graft Rejection (ABMR)                                                                     | Terminated         | UNS                                                   | Auto | BMMSCs   | 18 Years and older   | Not Applicable  | 4   | 2018/7/13 |                          |
| Kidney transplant       | NCT04388761 | Feasibility and Safety of Allogeneic Adipose Mesenchymal Stem Cells (aMSCs) Delivery Into Kidney Allografts Procured From Deceased Donors With High Kidney Donor Profile Index (KDPI) | Not yet recruiting | Intra parenchymal injection & Intra-arterial infusion | Allo | AdMSCs   | 18 Years and older   | Phase 2         | 15  | 2020/5/14 |                          |
| Kidney transplant       | NCT04445220 | A Study of Cell Therapy in COVID-19 Subjects With Acute Kidney Injury Who Are Receiving Renal Replacement Therapy                                                                     | Not yet recruiting | Integrated into the renal replacement circuit         | Allo | UNS      | 18 Years and older   | Phase 1 Phase 2 | 22  | 2020/6/24 |                          |
| Kidney/Liver transplant | NCT01429038 | Mesenchymal Stem Cells After Renal or Liver Transplantation                                                                                                                           | Unknown status     | IV                                                    | Allo | BMMSCs   | 18 Years to 75 Years | Phase 1 Phase 2 | 40  | 2011/9/5  | Detry 2017 <sup>82</sup> |
| Liver transplant        | NCT01690247 | Human Mesenchymal Stem Cells Induce Liver Transplant Tolerance                                                                                                                        | Unknown status     | IV                                                    | Allo | WJUCMSCs | 18 Years to 70 Years | Phase 1         | 50  | 2012/9/21 |                          |
| Liver transplant        | NCT02260375 | MSC Therapy in Liver Transplantation                                                                                                                                                  | Recruiting         | IV                                                    | Allo | BMMSCs   | 18 Years and older   | Phase 1         | 20  | 2014/10/9 |                          |
| Liver transplant        | NCT02706132 | Therapeutic Strategy and the Role of Mesenchymal Stromal Cells for ABO Incompatible Liver Transplantation                                                                             | Unknown status     | IV                                                    | Auto | UNS      | 18 Years to 60 Years | Phase 1 Phase 2 | 15  | 2016/3/11 |                          |
| Liver transplant        | NCT02957552 | Safety and Tolerance of Immunomodulating Therapy With Donor-specific MSC in Pediatric Living-Donor Liver Transplantation                                                              | Recruiting         | IV                                                    | Allo | BMMSCs   | 8 Weeks to 18 Years  | Phase 1         | 7   | 2016/11/6 |                          |

|                    |                 |                                                                                                              |                |         |      |                |                      |                 |    |           |  |  |
|--------------------|-----------------|--------------------------------------------------------------------------------------------------------------|----------------|---------|------|----------------|----------------------|-----------------|----|-----------|--|--|
| Lung<br>transplant | NCT04<br>714801 | Adipose Derived Mesenchymal Cell Treatment in Lung transplantation                                           |                |         |      |                |                      |                 |    |           |  |  |
| Skin<br>transplant | NCT03<br>113747 | Allogeneic ADSCs and Platelet-Poor Plasma Fibrin Hydrogel to Treat the Patients With Burn Wounds (ADSCs-BWs) | Unknown status | On skin | Allo | AdMSCs         | 18 Years to 65 Years | Phase 1 Phase 2 | 20 | 2017/4/14 |  |  |
| Skin<br>transplant | NCT04<br>234750 | Mesenchymal Stem Cell-derived Pleiotropic Factor in the Treatment of Donor Sites                             | Recruiting     | On skin | UNS  | UNS-<br>MSC-CM | 6 Years to 60 Years  | Phase 1         | 20 | 2020/1/21 |  |  |

Table S2: Clinical trials for autoimmune diseases using MSC-based products

| Conditions | NCT Number      | Title                                                                                                                                                                         | Status         | Delivery                 | Auto/Allo? | Source MSCs         | Age                  | Phases          | Enrollment | First Posted | Publications                                        |
|------------|-----------------|-------------------------------------------------------------------------------------------------------------------------------------------------------------------------------|----------------|--------------------------|------------|---------------------|----------------------|-----------------|------------|--------------|-----------------------------------------------------|
| CD         | NCT02<br>445547 | Umbilical Cord Mesenchymal Stem Cell Treatment for Crohn's Disease                                                                                                            | Completed      | IV                       | Allo       | WJUCMSCs            | 18 Years to 70 Years | Phase 1 Phase 2 | 82         | 2015/5/15    |                                                     |
| CD         | NCT02<br>000362 | Safety and Efficacy of FURESTEM-CD Inj. in Patients With Moderately Active Crohn's Disease(CD)                                                                                | Unknown status |                          | UNS        | Allo<br>UCBMS<br>Cs | 19 Years to 70 Years | Phase 1 Phase 2 | 24         | 2013/12/4    |                                                     |
| CD         | NCT01<br>915927 | Stem Cell Fistula Plug in Perianal Crohn's Disease                                                                                                                            | Completed      | Peri-fistula injection   | Auto       | AdMSCs              | 18 Years to 65 Years | Phase 1         | 20         | 2013/8/5     | Dietz 2017 <sup>85</sup>                            |
| CD         | NCT01<br>874015 | Transplantation of Bone Marrow Mesenchymal Stem Cell in Crohn's Disease                                                                                                       | Unknown status | Intraleisional injection | Auto       | BMMSCs              | 18 Years to 65 Years | Phase 1         | 10         | 2013/6/10    |                                                     |
| CD         | NCT01<br>541579 | Adipose Derived Mesenchymal Stem Cells for Induction of Remission in Perianal Fistulizing Crohn's Disease                                                                     | Completed      | Intraleisional injection | Allo       | AdMSCs              | 18 Years and older   | Phase 3         | 278        | 2012/3/1     | Panés 2016 <sup>84</sup> , Panés 2018 <sup>86</sup> |
| CD         | NCT01<br>144962 | Dose-escalating Therapeutic Study of Allogeneic Bone Marrow Derived Mesenchymal Stem Cells for the Treatment of Fistulas in Patients With Refractory Perianal Crohn's Disease | Completed      | Peri-fistula injection   | Allo       | BMMSCs              | 18 Years and older   | Phase 1 Phase 2 | 21         | 2010/6/16    | Molendijk 2015 <sup>83</sup>                        |
| CD         | NCT00<br>482092 | Evaluation of PROCHYMAL® Adult Human Stem Cells for Treatment-resistant Moderate-to-severe Crohn's Disease                                                                    | Completed      | IV                       | Allo       | BMMSCs              | 18 Years to 70 Years | Phase 3         | 330        | 2007/6/4     |                                                     |
| CD         | NCT00<br>543374 | Extended Evaluation of PROCHYMAL® Adult Human Stem Cells for Treatment-Resistant Moderate-to-Severe Crohn's Disease                                                           | Completed      | IV                       | Allo       | BMMSCs              | 18 Years to 70 Years | Phase 3         | 98         | 2007/10/15   |                                                     |
| CD         | NCT00<br>294112 | Prochymal® Adult Human Mesenchymal Stem Cells for Treatment of Moderate-to-severe Crohn's Disease                                                                             | Completed      | IV                       | Allo       | BMMSCs              | 18 Years to 70 Years | Phase 2         | 10         | 2006/2/20    |                                                     |



|    |             |                                                                                                                 |                    |                         |      |          |                      |                 |    |           |                           |
|----|-------------|-----------------------------------------------------------------------------------------------------------------|--------------------|-------------------------|------|----------|----------------------|-----------------|----|-----------|---------------------------|
| CD | NCT04073472 | Mesenchymal Stem Cells for the Treatment of Pouch Fistulas in Crohn's                                           | Not yet recruiting | Peri-fistula injection  | Allo | BMMSCs   | 18 Years to 75 Years | Phase 1         | 15 | 2019/8/29 |                           |
| CD | NCT04519684 | Study of Mesenchymal Stem Cells for the Treatment of Ileal Pouch Fistula's in Participants With Crohn's Disease | Not yet recruiting | Peri-fistula injection  | Allo | BMMSCs   | 18 Years to 75 Years | Phase 1 Phase 2 | 20 | 2020/8/20 |                           |
| CD | NCT04519697 | Mesenchymal Stem Cells for the Treatment of Rectovaginal Fistulas in Participants With Crohn's Disease          | Not yet recruiting | Peri-fistula injection  | Allo | BMMSCs   | 18 Years to 75 Years | Phase 1 Phase 2 | 20 | 2020/8/20 |                           |
| CD | NCT04519671 | Mesenchymal Stem Cells for the Treatment of Perianal Fistulizing Crohn's Disease                                | Not yet recruiting | Peri-fistula injection  | Allo | BMMSCs   | 18 Years to 75 Years | Phase 1 Phase 2 | 20 | 2020/8/20 |                           |
| CD | NCT01659762 | A Phase I Study Evaluating Autologous Bone Marrow Derived Mesenchymal Stromal for Crohn's Disease.              | Completed          | IV                      | Auto | BMMSCs   | 18 Years to 65 Years | Phase 1         | 16 | 2012/8/8  |                           |
| CD | NCT01090817 | An Australian Study of Mesenchymal Stromal Cells for Crohn's Disease                                            | Completed          | IV                      | Allo | UNS      | 18 Years to 55 Years | Phase 2         | 21 | 2010/3/23 | Forbes 2014 <sup>87</sup> |
| CD | NCT03555773 | Micro-fragmented Adipose Tissue and Complex Crohns' Anal Fistulas                                               | Completed          | Peri-fistula injection  | Auto | AdMSCs   | 18 Years and older   | Not Applicable  | 15 | 2018/6/14 |                           |
| CD | NCT02926300 | Long-term Safety and Efficacy of FURESTEM-CD Inj. in Patients With Moderately Active Crohn's Disease(CD)        | Recruiting         | UNS                     | Allo | UCBMS Cs | 19 Years to 70 Years | Not Applicable  | 24 | 2016/10/6 |                           |
| CD | NCT03209700 | Re-treatment From a Phase I Study of MSC-AFP in Patients With Perianal Fistulas                                 | Completed          | Peri-fistula injection  | Auto | AdMSCs   | 18 Years to 65 Years | Phase 1         | 7  | 2017/7/6  |                           |
| CD | NCT03014219 | Phase 1 Crohn's Pediatric Sub-study of MSC AFP                                                                  | Withdrawn          | Peri-fistula injection  | Auto | AdMSCs   | 12 Years to 17 Years | Phase 1         | 0  | 2017/1/9  |                           |
| CD | NCT03449069 | Pediatric MSC-AFP Sub-study for Crohn's Fistula                                                                 | Recruiting         | Peri-fistula injection  | Auto | UNS      | 12 Years to 17 Years | Phase 1         | 5  | 2018/2/28 |                           |
| CD | NCT03901235 | MSC Intratissular Injection in Crohn Disease Patients                                                           | Recruiting         | Intratissular injection | UNS  | UNS      | 18 Years and older   | Phase 1 Phase 2 | 60 | 2019/4/3  |                           |

|     |             |                                                                                                                                 |                        |                               |      |          |                      |                 |    |                                            |
|-----|-------------|---------------------------------------------------------------------------------------------------------------------------------|------------------------|-------------------------------|------|----------|----------------------|-----------------|----|--------------------------------------------|
| CD  | NCT01540292 | Mesenchymal Stem Cell Therapy for the Treatment of Severe or Refractory Inflammatory and/or Autoimmune Disorders                | Unknown status         | IV                            | Allo | BMMSCs   | 18 Years to 75 Years | Phase 1 Phase 2 | 20 | 2012/2/28                                  |
| CD  | NCT04548583 | Study of Mesenchymal Stem Cells for the Treatment of Medically Refractory Crohn's Colitis                                       | Recruiting             | Submucosal injection in colon | Allo | BMMSCs   | 18 Years to 75 Years | Phase 1 Phase 2 | 24 | 2020/9/14                                  |
| CD  | NCT04519671 | Mesenchymal Stem Cells for the Treatment of Perianal Fistulizing Crohn's Disease                                                | Recruiting             | Peri-fistula injection        | Allo | BMMSCs   | 18 Years to 75 Years | Phase 1 Phase 2 | 20 | 2020/8/20                                  |
| CD  | NCT04791878 | Study of Mesenchymal Stem Cells for Pediatric Perianal Fistulizing Crohn's Disease                                              | Not yet recruiting     | Peri-fistula injection        | Allo | BMMSCs   | 13 Years to 17 Years | Phase 1         | 10 | 2021/3/10                                  |
| IBD | NCT01157650 | Treatment of Fistulous Crohn's Disease by Implant of Autologous Mesenchymal Stem Cells Derived From Adipose Tissue              | Completed              | UNS                           | Auto | AdMSCs   | 18 Years and older   | Phase 1 Phase 2 | 15 | 2010/7/7                                   |
| IBD | NCT03299413 | Use of Mesenchymal Stem Cells in Inflammatory Bowel Disease                                                                     | Active, not recruiting | IV                            | Allo | WJUCMSCs | 18 Years to 75 Years | Phase 1 Phase 2 | 20 | 2017/10/3                                  |
| IBD | NCT02677350 | AlloGeneic Human Mesenchymal Stem Cells (hMSC) in PATients With FistuLizing Crohn's Disease Via PERifistula iNjEctions (GALENE) | Withdrawn              | Peri-fistula injection        | Allo | BMMSCs   | 18 Years and older   | Phase 1         | 0  | 2016/2/9                                   |
| UC  | NCT02442037 | Human Umbilical-Cord-Derived Mesenchymal Stem Cell Therapy in Active Ulcerative Colitis                                         | Unknown status         | IV                            | Allo | WJUCMSCs | 18 Years to 65 Years | Phase 1 Phase 2 | 30 | 2015/5/13                                  |
| UC  | NCT01221428 | Umbilical Cord Mesenchymal Stem Cells Infusion for Ulcerative Colitis                                                           | Unknown status         | IV                            | Allo | WJUCMSCs | 18 Years to 70 Years | Phase 1 Phase 2 | 50 | 2010/10/15 <sup>Hu 2016<sup>88</sup></sup> |
| UC  | NCT01914887 | Allogeneic Adipose Tissue-derived Mesenchymal Stem Cells for the Induction of Remission in Ulcerative Colitis                   | Unknown status         | Endoscopic injection          | Allo | AdMSCs   | 18 Years and older   | Phase 1 Phase 2 | 8  | 2013/8/2                                   |
| UC  | NCT04543994 | Study of Mesenchymal Stem Cells for the Treatment of Medically Refractory Ulcerative Colitis (UC)                               | Not yet recruiting     | Submucosal injection in colon | Allo | BMMSCs   | 18 Years to 75 Years | Phase 1 Phase 2 | 24 | 2020/9/10                                  |
| UC  | NCT04312113 | Angiographic Delivery of AD- MSC for Ulcerative Colitis                                                                         | Not yet recruiting     | Intraarterial injection       | Auto | AdMSCs   | 18 Years to 65 Years | Phase 1         | 20 | 2020/3/18                                  |

|    |             |                                                                                                                                               |                |                               |      |           |                      |                 |    |            |                                                            |
|----|-------------|-----------------------------------------------------------------------------------------------------------------------------------------------|----------------|-------------------------------|------|-----------|----------------------|-----------------|----|------------|------------------------------------------------------------|
| UC | NCT03609905 | Adipose Mesenchymal Stem Cells (AMSC) for Treatment of Ulcerative Colitis                                                                     | Recruiting     | Submucosal injection in colon | Auto | AdMSCs    | 18 Years to 65 Years | Phase 1 Phase 2 | 50 | 2018/8/1   |                                                            |
| MS | NCT00395200 | Mesenchymal Stem Cells in Multiple Sclerosis (MSCIMS)                                                                                         | Completed      | IV                            | Auto | BMMSCs    | 18 Years to 65 Years | Phase 1 Phase 2 | 10 | 2006/11/2  | Connick 2011 <sup>90</sup> ,<br>Connick 2012 <sup>91</sup> |
| MS | NCT00781872 | Mesenchymal Stem Cells for the Treatment of MS                                                                                                | Completed      | Intrathecal injection         | Auto | BMMSCs    | 35 Years to 65 Years | Phase 1 Phase 2 | 20 | 2008/10/29 | Karussis 2010 <sup>89</sup>                                |
| MS | NCT00813969 | Autologous Mesenchymal Stem Cell (MSC) Transplantation in MS                                                                                  | Completed      | IV                            | Auto | UNS       | 18 Years to 55 Years | Phase 1         | 24 | 2008/12/23 | Cohen 2018 <sup>93</sup>                                   |
| MS | NCT01056471 | Autologous Mesenchymal Stem Cells From Adipose Tissue in Patients With Secondary Progressive Multiple Sclerosis                               | Completed      | IV                            | Auto | AdMSCs    | 18 Years and older   | Phase 1 Phase 2 | 30 | 2010/1/26  |                                                            |
| MS | NCT01228266 | Mesenchymal Stem Cell Transplantation in MS                                                                                                   | Terminated     | IV                            | Auto | UNS       | 18 Years to 50 Years | Phase 2         | 9  | 2010/10/26 | Llufriu 2014 <sup>92</sup>                                 |
| MS | NCT01364246 | Safety and Efficacy of Umbilical Cord Mesenchymal Stem Cell Therapy for Patients With Progressive Multiple Sclerosis and Neuromyelitis Optica | Unknown status | UNS                           | Allo | WJUCMS Cs | 18 Years to 60 Years | Phase 1 Phase 2 | 20 | 2011/6/2   |                                                            |
| MS | NCT01377870 | Evaluation of Autologous Mesenchymal Stem Cell Transplantation (Effects and Side Effects) in Multiple Sclerosis                               | Completed      | IV                            | Auto | BMMSCs    | 18 Years to 55 Years | Phase 1 Phase 2 | 22 | 2011/6/21  |                                                            |
| MS | NCT01606215 | Stem Cells in Rapidly Evolving Active Multiple Sclerosis                                                                                      | Completed      | IV                            | Auto | BMMSCs    | 18 Years to 50 Years | Phase 1 Phase 2 | 21 | 2012/5/25  | Uccelli 2019 <sup>94</sup>                                 |
| MS | NCT01730547 | Mesenchymal Stem Cells for Multiple Sclerosis                                                                                                 | Unknown status | IV                            | Auto | UNS       | 18 Years to 50 Years | Phase 1 Phase 2 | 15 | 2012/11/21 | Uccelli 2019 <sup>94</sup>                                 |
| MS | NCT01745783 | Mesenchymal Cells From Autologous Bone Marrow, Administered Intravenously in Patients Diagnosed With Multiple Sclerosis                       | Recruiting     | IV                            | Auto | BMMSCs    | 18 Years to 50 Years | Phase 1 Phase 2 | 30 | 2012/12/10 | Uccelli 2019 <sup>94</sup>                                 |
| MS | NCT01854957 | Mesenchymal Stem Cells for Multiple Sclerosis                                                                                                 | Unknown status | IV                            | Auto | UNS       | 18 Years to 50 Years | Phase 1 Phase 2 | 20 | 2013/5/16  | Uccelli 2019 <sup>94</sup>                                 |
| MS | NCT01895439 | Safety and Efficacy Study of Autologous Bone Marrow Mesenchymal Stem Cells in Multiple Sclerosis                                              | Completed      | Intrathecal injection         | Auto | BMMSCs    | 18 Years to 65 Years | Phase 1 Phase 2 | 13 | 2013/7/10  |                                                            |

|    |             |                                                                                                                            |                    |                          |      |           |                      |                 |    |            |                             |
|----|-------------|----------------------------------------------------------------------------------------------------------------------------|--------------------|--------------------------|------|-----------|----------------------|-----------------|----|------------|-----------------------------|
| MS | NCT02034188 | Feasibility Study of Human Umbilical Cord Tissue-Derived Mesenchymal Stem Cells in Patients With Multiple Sclerosis        | Completed          | IV                       | Allo | WJUCMS Cs | 18 Years to 55 Years | Phase 1 Phase 2 | 20 | 2014/1/13  | Riordan 2018 <sup>95</sup>  |
| MS | NCT02035514 | Phase I-II Clinical Trial With Autologous Bone Marrow Derived Mesenchymal Stem Cells for the Therapy of Multiple Sclerosis | Completed          | IV                       | Auto | BMMSCs    | 18 Years to 50 Years | Phase 1 Phase 2 | 9  | 2014/1/14  | Uccelli 2019 <sup>94</sup>  |
| MS | NCT02166021 | Clinical Efficacy of Autologous Mesenchymal Bone Marrow Stem Cells in Active & Progressive Multiple Sclerosis              | Completed          | IV/Intrathecal injection | Auto | BMMSCs    | 18 Years to 65 Years | Phase 2         | 48 | 2014/6/18  |                             |
| MS | NCT02239393 | Safety and Efficacy of Intravenous Autologous Mesenchymal Stem Cells for MS: a Phase 2 Proof of Concept Study              | Completed          | IV                       | Auto | UNS       | 18 Years to 50 Years | Phase 2         | 31 | 2014/9/12  | Uccelli 2019 <sup>94</sup>  |
| MS | NCT02326935 | Multi-Center Study Safety of Adipose Derived Mesenchymal Stem Cells for the Treatment of Multiple Sclerosis                | Terminated         | IV                       | Auto | AdMSCs    | 18 Years to 65 Years | Phase 1         | 2  | 2014/12/30 |                             |
| MS | NCT02403947 | Mesenchymal Stem Cells for Multiple Sclerosis                                                                              | Terminated         | IV                       | Auto | BMMSCs    | 18 Years to 50 Years | Phase 1 Phase 2 | 1  | 2015/3/31  | Uccelli 2019 <sup>94</sup>  |
| MS | NCT02418325 | A Study of Allogeneic Human UC-MSc and Liberation Therapy (When Associated With CCSVI) in Patients With RRMS               | Terminated         | IV/Intrathecal injection | Allo | WJUCMS Cs | 18 Years to 60 Years | Phase 1 Phase 2 | 69 | 2015/4/16  |                             |
| MS | NCT02495766 | Autologous Mesenchymal Stromal Cells for Multiple Sclerosis                                                                | Completed          | IV                       | Auto | BMMSCs    | 18 Years to 60 Years | Phase 1 Phase 2 | 8  | 2015/7/13  |                             |
| MS | NCT02587715 | A Study of Allogeneic Human UC-MSc and Liberation Therapy (When Associated With CCSVI) in Patients With RRMS               | Unknown status     | IV/Intrathecal injection | Allo | WJUCMS Cs | 18 Years to 60 Years | Phase 1 Phase 2 | 69 | 2015/10/27 |                             |
| MS | NCT03326505 | Allogenic Mesenchymal Stem Cells And Physical Therapy for MS Treatment                                                     | Completed          | Intrathecal injection    | Allo | WJUCMS Cs | 18 Years to 65 Years | Phase 1 Phase 2 | 60 | 2017/10/31 | Alghwiri 2020 <sup>96</sup> |
| MS | NCT03778333 | Mesenchymal Stem Cells for Progressive Multiple Sclerosis_Sweden                                                           | Completed          | IV                       | Auto | BMMSCs    | 18 Years to 65 Years | Phase 1         | 7  | 2018/12/19 |                             |
| MS | NCT03799718 | Safety and Efficacy of Repeated Administration of NurOwn (MSC-Recruiting NTF Cells) in Participants With Progressive MS    | Recruiting         | Intrathecal injection    | Auto | BMMSC-NF  | 18 Years to 65 Years | Phase 2         | 20 | 2019/1/10  |                             |
| MS | NCT04749667 | Study of Mesenchymal Autologous Stem Cells as Regenerative Treatment for Multiple Sclerosis                                | Not yet recruiting | Intrathecal injection    | Auto | BMMSCs    | 18 Years to 55 Years | Phase 1 Phase 2 | 18 | 2021/2/11  |                             |

|      |             |                                                                                                              |                         |                         |           |                 |                      |                 |    |            |                              |
|------|-------------|--------------------------------------------------------------------------------------------------------------|-------------------------|-------------------------|-----------|-----------------|----------------------|-----------------|----|------------|------------------------------|
| T1DM | NCT00690066 | PROCHYMAL® (Human Adult Stem Cells) for the Treatment of Recently Diagnosed Type 1 Diabetes Mellitus (T1DM)  | Completed               | IV                      | Allo      | BMMSCs          | 12 Years to 35 Years | Phase 2         | 63 | 2008/6/4   |                              |
| T1DM | NCT01068951 | Treatment of Patients With Newly Onset of Type 1 Diabetes With Mesenchymal Stem Cells                        | Completed               | IV                      | Auto      | BMMSCs          | 18 Years to 40 Years | Not Applicable  | 20 | 2010/2/17  | Carlsson 2015 <sup>103</sup> |
| T1DM | NCT01157403 | Autologous Transplantation of Mesenchymal Stem Cells for Treatment of Patients With Onset of Type 1 Diabetes | Unknown status          | IV                      | Auto      | BMMSCs          | 10 Years to 40 Years | Phase 2 Phase 3 | 80 | 2010/7/7   |                              |
| T1DM | NCT01219465 | Umbilical Cord Mesenchymal Stem Cells Infusion for Initial Type 1 Diabetes Mellitus                          | Unknown status          | IV                      | Allo      | WJUCMSCs        | 3 Years to 35 Years  | Phase 1 Phase 2 | 50 | 2010/10/13 |                              |
| T1DM | NCT01322789 | Safety and Efficacy of Mesenchymal Stem Cells in Newly-diagnosed Type 1 Diabetic Patients                    | Unknown status          | IV                      | UNS       | BMMSCs          | 12 Years to 35 Years | Phase 1 Phase 2 | 10 | 2011/3/25  |                              |
| T1DM | NCT01374854 | Umbilical Mesenchymal Stem Cells and Mononuclear Cells Infusion in Type 1 Diabetes Mellitus                  | Unknown status          | Intraarterial injection | Allo      | WJUCMSCs        | 18 Years to 40 Years | Phase 1 Phase 2 | 44 | 2011/6/16  | Cai 2016 <sup>104</sup>      |
| T1DM | NCT01496339 | Human Menstrual Blood-derived Mesenchymal Stem Cells Transplantation in Treating Type 1 Diabetic Patients    | Unknown status          | IV                      | Allo      | MenSCs          | 18 Years to 75 Years | Phase 1 Phase 2 | 50 | 2011/12/21 |                              |
| T1DM | NCT02057211 | Mesenchymal Stem Cells to Intervene in the Development of Type 1 Diabetes: a Blinded Randomized Study        | Suspended               | UNS                     | Auto      | UNS             | 18 Years to 40 Years | Phase 2         | 50 | 2014/2/7   |                              |
| T1DM | NCT02138331 | Effect of Microvesicles and Exosomes Therapy on $\beta$ -cell Mass in Type I Diabetes Mellitus (T1DM)        | Unknown status          | IV                      | Allo      | UCBMS C-exosome | 18 Years to 60 Years | Phase 2 Phase 3 | 20 | 2014/5/14  |                              |
| T1DM | NCT02893306 | MSC Administration for the Management of Type 1 Diabetic Patients                                            | Unknown status          | IV                      | Allo      | BMMSCs          | 18 Years and older   | Phase 2         | 10 | 2016/9/8   |                              |
| T1DM | NCT02940418 | Use of Stem Cells in Diabetes Mellitus Type 1                                                                | Recruiting              | IV                      | Allo      | AdMSCs          | 18 Years to 35 Years | Phase 1         | 20 | 2016/10/20 |                              |
| T1DM | NCT03406585 | Wharton's Jelly Derived Mesenchymal Stromal Cell Treatment of Adult Patients Diagnosed With Type I Diabetes  | Recruiting              | IV                      | Allo      | WJUCMSCs        | 18 Years to 40 Years | Phase 1 Phase 2 | 24 | 2018/1/23  |                              |
| T1DM | NCT03484741 | Mesenchymal Stem Cell Therapy for Type 1 Diabetes Mellitus Patients                                          | Unknown status          | IV                      | Auto/Allo | BMMSCs/WJUCMSCs | 18 Years to 45 Years | Phase 1 Phase 2 | 15 | 2018/4/2   |                              |
| T1DM | NCT03920397 | Mesenchymal Stem Cells in Patients With Type 1 Diabetes Mellitus                                             | Enrolling by invitation | IV                      | Allo      | AdMSCs          | 16 Years to 35 Years | Not Applicable  | 30 | 2019/4/18  | Araujo 2020 <sup>105</sup>   |

|      |                 |                                                                                                                                  |                              |     |               |                         |                               |                       |     |           |                              |
|------|-----------------|----------------------------------------------------------------------------------------------------------------------------------|------------------------------|-----|---------------|-------------------------|-------------------------------|-----------------------|-----|-----------|------------------------------|
| T1DM | NCT03<br>973827 | Wharton's Jelly Derived<br>Mesenchymal Stromal Cell<br>Repeated Treatment of Adult<br>Patients Diagnosed With Type 1<br>Diabetes | Recruiting                   | UNS | Allo          | WJUCMS<br>Cs            | 18<br>Years to<br>64<br>Years | Phase<br>1 Phase<br>2 | 18  | 2019/6/4  |                              |
| T1DM | NCT04<br>061746 | Cellular Therapy for Type 1<br>Diabetes Using Mesenchymal<br>Stem Cells                                                          | Recruiting                   | IV  | Allo          | WJUCMS<br>Cs            | 12<br>Years to<br>30<br>Years | Phase<br>1            | 50  | 2019/8/20 |                              |
| T1DM | NCT04<br>078308 | Mesenchymal Stem Cells<br>Transplantation in Newly<br>Diagnosed Type-1 Diabetes<br>Patients                                      | Active,<br>not<br>recruiting | IV  | Auto          | BMMSCs                  | 8 Years<br>to 40<br>Years     | Phase<br>1 Phase<br>2 | 20  | 2019/9/6  |                              |
| T1DM | NCT01<br>143168 | Stem Cell Therapy for Type 1<br>Diabetes Mellitus                                                                                | Unknown<br>status            | IV  | Auto/<br>Allo | BMMSCs<br>/WJUCM<br>SCs | 18<br>Years to<br>50<br>Years | Phase<br>1            | 24  | 2010/6/14 |                              |
| SLE  | NCT00<br>659217 | Effect of Mesenchymal Stem Cell<br>Transplantation for Lupus<br>Nephritis                                                        | Unknown<br>status            | UNS | Auto          | UNS                     | 18<br>Years to<br>60<br>Years | Phase<br>1 Phase<br>2 | 20  | 2008/4/16 |                              |
| SLE  | NCT03<br>174587 | Evaluate the Safety of CS20AT04<br>Inj. in Subjects With Lupus<br>Nephritis                                                      | Completed                    | IV  | Allo          | BMMSCs                  | 18<br>Years to<br>69<br>Years | Phase<br>1            | 7   | 2017/6/2  |                              |
| SLE  | NCT03<br>458156 | Umbilical Cord Mesenchymal<br>Stem Cell Transplantation for<br>Lupus Nephritis                                                   | Unknown<br>status            | UNS | Allo          | WJUCMS<br>Cs            | 18<br>Years to<br>60<br>Years | Phase<br>1 Phase<br>2 | 30  | 2018/3/8  |                              |
| SLE  | NCT03<br>673748 | Treatment of Lupus Nephritis<br>With Allogeneic Mesenchymal<br>Stem Cells                                                        | Not yet<br>recruiting        | IV  | Allo          | UNS                     | 18<br>Years to<br>65<br>Years | Phase<br>2            | 36  | 2018/9/17 |                              |
| SLE  | NCT03<br>917797 | Mesenchymal Stromal Cells<br>(MSC's) in Renal Lupus                                                                              | Recruiting                   | IV  | Allo          | WJUCMS<br>Cs            | 18<br>Years to<br>75<br>Years | Phase<br>2            | 39  | 2019/4/17 |                              |
| SLE  | NCT04<br>318600 | Allogeneic Amniotic<br>Mesenchymal Stem Cell Therapy<br>for Lupus Nephritis                                                      | Completed                    | IV  | Allo          | Amniotic<br>MSCs        | 14<br>Years to<br>60<br>Years | Phase<br>1            | 16  | 2020/3/24 |                              |
| SLE  | NCT04<br>522505 | Long-term Follow-up for<br>Evaluating the Safety of<br>CS20AT04 in Subject With<br>Lupus Nephritis                               | Active,<br>not<br>recruiting | UNS | Allo          | BMMSCs                  | 17<br>Years to<br>70<br>Years | Phase<br>1 Phase<br>2 | 7   | 2020/8/21 |                              |
| SLE  | NCT03<br>580291 | Human Umbilical Cord<br>Mesenchymal Stem Cells<br>Treatment for Lupus Nephritis<br>(LN)                                          | Not yet<br>recruiting        | IV  | Allo          | WJUCMS<br>Cs            | 18<br>Years to<br>60<br>Years | Phase<br>2            | 230 | 2018/7/9  |                              |
| SLE  | NCT00<br>698191 | Mesenchymal Stem Cells<br>Transplantation for Refractory<br>Systemic Lupus Erythematosus<br>(SLE)                                | Unknown<br>status            | IV  | Allo          | BMMSCs                  | 15<br>Years to<br>70<br>Years | Phase<br>1 Phase<br>2 | 20  | 2008/6/17 | Liang<br>2018 <sup>106</sup> |
| SLE  | NCT01<br>539902 | Phase 2 Study of Human<br>Umbilical Cord Derived<br>Mesenchymal Stem Cell for the<br>Treatment of Lupus Nephritis                | Unknown<br>status            | UNS | Allo          | WJUCMS<br>Cs            | 16<br>Years to<br>65<br>Years | Phase<br>2            | 25  | 2012/2/28 | Deng<br>2017 <sup>107</sup>  |

|     |             |                                                                                                                                                                          |                        |     |      |           |                      |                 |     |            |                                                     |
|-----|-------------|--------------------------------------------------------------------------------------------------------------------------------------------------------------------------|------------------------|-----|------|-----------|----------------------|-----------------|-----|------------|-----------------------------------------------------|
| SLE | NCT01741857 | Umbilical Cord Derived Mesenchymal Stem Cells Transplantation for Active and Refractory Systemic Lupus Erythematosus                                                     | Unknown status         | UNS | Allo | WJUCMS Cs | 15 Years to 60 Years | Phase 1 Phase 2 | 40  | 2012/12/5  | Wang 2014 <sup>109</sup> , Wang 2014 <sup>108</sup> |
| SLE | NCT02633163 | Phase 2 Trial of Mesenchymal Stem Cells in Systemic Lupus Erythematosus (MiSLE)                                                                                          | Recruiting             | IV  | Allo | WJUCMS Cs | 18 Years to 65 Years | Phase 2         | 81  | 2015/12/17 |                                                     |
| SLE | NCT03171194 | Pilot Trial of Mesenchymal Stem Cells for Systemic Lupus Erythematosus                                                                                                   | Completed              | IV  | Allo | WJUCMS Cs | 18 Years to 65 Years | Phase 1         | 6   | 2017/5/31  |                                                     |
| SLE | NCT03219801 | Umbilical Cord Derived Mesenchymal Stem Cells Therapy in Systemic Lupus Erythematosus                                                                                    | Unknown status         | IV  | Allo | WJUCMS Cs | 14 Years to 60 Years | Early Phase 1   | 10  | 2017/7/18  |                                                     |
| SLE | NCT03562065 | Treatment of Refractory Systemic Lupus Erythematosus by Allogeneic Mesenchymal Stem Cells Derived From the Umbilical Cord                                                | Not yet recruiting     | IV  | Allo | WJUCMS Cs | 18 Years to 70 Years | Phase 1 Phase 2 | 10  | 2018/6/19  |                                                     |
| SLE | NCT04184258 | Treatment of Systemic Lupus Erythematosus With Pooled Allogenic Mesenchymal Stem Cells                                                                                   | Recruiting             | UNS | Allo | OMMSCs    | 18 Years to 75 Years | Phase 1 Phase 2 | 10  | 2019/12/3  |                                                     |
| RA  | NCT01985464 | Umbilical Cord Tissue-derived Mesenchymal Stem Cells for Rheumatoid Arthritis                                                                                            | Active, not recruiting | IV  | Allo | WJUCMS Cs | 18 Years and older   | Phase 1 Phase 2 | 20  | 2013/11/15 |                                                     |
| RA  | NCT01547091 | Safety and Efficacy Study of Umbilical Cord-Derived Mesenchymal Stem Cells for Rheumatoid Arthritis                                                                      | Unknown status         | IV  | Allo | WJUCMS Cs | 18 Years to 70 Years | Phase 1 Phase 2 | 200 | 2012/3/7   |                                                     |
| RA  | NCT03828344 | Safety and Tolerability of a Single Intravenous Infusion of BX-U001 in Refractory Rheumatoid Arthritis                                                                   | Not yet recruiting     | IV  | Allo | WJUCMS Cs | 18 Years to 70 Years | Phase 1         | 16  | 2019/2/4   |                                                     |
| RA  | NCT03691909 | A Clinical Trial to Determine the Safety and Efficacy of Hope Biosciences Autologous Mesenchymal Stem Cell Therapy (HB-adMSCs) for the Treatment of Rheumatoid Arthritis | Active, not recruiting | IV  | Auto | AdMSCs    | 18 Years to 65 Years | Phase 1 Phase 2 | 15  | 2018/10/2  |                                                     |
| RA  | NCT03798028 | The Safety and Effects of Mesenchymal Stem Cell (MSCs) in the Treatment of Rheumatoid Arthritis                                                                          | Recruiting             | IV  | Allo | UCBMS Cs  | 18 Years to 70 Years | Phase 1 Phase 2 | 250 | 2019/1/9   |                                                     |
| RA  | NCT03186417 | Mesenchymal Stem Cells in Early Rheumatoid Arthritis                                                                                                                     | Recruiting             | IV  | Allo | UNS       | 18 Years to 80 Years | Phase 1         | 20  | 2017/6/14  |                                                     |
| RA  | NCT01663116 | Cx611-0101, eASCs Intravenous Administration to Refractory Rheumatoid Arthritis Patients                                                                                 | Completed              | IV  | Allo | AdMSCs    | 18 Years and older   | Phase 1 Phase 2 | 53  | 2012/8/13  | Álvaro-Gracia 2017 <sup>97</sup>                    |

|           |             |                                                                                                                       |                        |                |      |           |                      |                 |     |            |                                |
|-----------|-------------|-----------------------------------------------------------------------------------------------------------------------|------------------------|----------------|------|-----------|----------------------|-----------------|-----|------------|--------------------------------|
| RA        | NCT01873625 | Transplantation of Bone Marrow Derived Mesenchymal Stem Cells in Affected Knee Osteoarthritis by Rheumatoid Arthritis | Completed              | Intraarticular | Auto | BMMSCs    | 10 Years to 65 Years | Phase 2 Phase 3 | 60  | 2013/6/10  | Shadman far 2018 <sup>98</sup> |
| RA        | NCT02643823 | Human Umbilical Cord-Mesenchymal Stem Cells for Rheumatoid Arthritis                                                  | Unknown status         | IV             | Allo | WJUCMS Cs | 18 Years to 80 Years | Phase 1         | 40  | 2015/12/31 |                                |
| RA        | NCT04170426 | Autologous Adipose-derived Stem Cells (AdMSCs) for Rheumatoid Arthritis                                               | Not yet recruiting     | IV             | Auto | AdMSCs    | 18 Years to 75 Years | Phase 1 Phase 2 | 54  | 2019/11/20 |                                |
| RA        | NCT03067870 | Transplantation of Autologous Bone Marrow Derived Stem Cells in Patients With Rheumatoid Arthritis                    | Active, not recruiting | IV             | Auto | BMMSCs    | 17 Years to 75 Years | Phase 1         | 100 | 2017/3/1   |                                |
| RA        | NCT03333681 | Evaluation of Stem Cell Therapy Effects on the Immune Response in Rheumatoid Arthritis Patients                       | Completed              | IV             | Auto | BMMSCs    | 35 Years to 60 Years | Phase 1         | 15  | 2017/11/7  |                                |
| Psoriasis | NCT02491658 | Safety and Efficacy of UC-MSCs in Patients With Psoriasis Vulgaris                                                    | Unknown status         | IV             | Allo | WJUCMS Cs | 18 Years to 65 Years | Phase 1 Phase 2 | 30  | 2015/7/8   |                                |
| Psoriasis | NCT02918123 | Safety of FURESTEM-CD Inj. in Patients With Moderate to Severe Plaque-type Psoriasis                                  | Recruiting             | SQ             | Allo | UCBMS Cs  | 19 Years to 65 Years | Phase 1         | 9   | 2016/9/28  |                                |
| Psoriasis | NCT03265613 | Safety and Efficacy of Expanded Allogeneic AD-MSCs in Patients With Moderate to Severe Psoriasis                      | Active, not recruiting | IV             | Allo | AdMSCs    | 18 Years to 65 Years | Phase 1 Phase 2 | 7   | 2017/8/29  |                                |
| Psoriasis | NCT03392311 | Efficacy and Safety of AD-MSCs Plus Calpocitriol Ointment in Patients With Moderate to Severe Psoriasis               | Recruiting             | IV             | Allo | AdMSCs    | 18 Years to 65 Years | Phase 1 Phase 2 | 5   | 2018/1/5   |                                |
| Psoriasis | NCT03424629 | Safety and Efficacy of UC-MSCs in Patients With Plaque Psoriasis                                                      | Unknown status         | UNS            | Allo | WJUCMS Cs | 18 Years to 60 Years | Phase 1         | 57  | 2018/2/7   |                                |
| Psoriasis | NCT03745417 | Efficacy and Safety of Expanded UCMSCs On Patients With Moderate to Severe Psoriasis                                  | Recruiting             | IV             | Allo | WJUCMS Cs | 18 Years to 65 Years | Phase 1 Phase 2 | 5   | 2018/11/19 |                                |
| Psoriasis | NCT03765957 | Clinical Research on Treatment of Psoriasis by Human Umbilical Cord-derived Mesenchymal Stem Cells                    | Not yet recruiting     | IV             | Allo | WJUCMS Cs | 18 Years to 65 Years | Early Phase 1   | 50  | 2018/12/5  |                                |
| Psoriasis | NCT04275024 | Efficacy and Safety of AD-MSCs Plus Calpocitriol Ointment and PSORI-CM01 Granule in Psoriasis Patients                | Recruiting             | IV             | UNS  | AdMSCs    | 18 Years to 65 Years | Phase 1 Phase 2 | 8   | 2020/2/19  |                                |
| Psoriasis | NCT04785027 | Comparison of PSORI-CM01 Formula vs Gu Ben Hua Yu Formula Combined With AD-MSCs in Psoriasis                          | Recruiting             | IV             | Allo | AdMSCs    | 18 Years to 65 Years | Phase 1 Phase 2 | 16  | 2021/3/5   |                                |



|                                |             |                                                                                                                      |                      |                             |      |           |                      |                 |     |            |                           |
|--------------------------------|-------------|----------------------------------------------------------------------------------------------------------------------|----------------------|-----------------------------|------|-----------|----------------------|-----------------|-----|------------|---------------------------|
| Acquired Aplastic Anemia       | NCT01297972 | Mesenchymal Stem Cells in the Treatment of Relapsed/Refractory Severe Acquired Aplastic Anemia                       | Completed            | IV                          | Allo | BMMSCs    | 18 Years to 65 Years | Phase 1 Phase 2 | 9   | 2011/2/17  | Clé 2015 <sup>99</sup>    |
| Autoimmune hepatitis           | NCT01661842 | Umbilical Cord Mesenchymal Stem Cells for Patients With Autoimmune Hepatitis                                         | Unknown status       | IV                          | Allo | WJUCMS Cs | 18 Years to 65 Years | Phase 1 Phase 2 | 100 | 2012/8/10  |                           |
| Immune Thrombocytopenia        | NCT04014166 | Study of Human Umbilical Cord-derived Mesenchymal Stem Cells for Treatment of Refractory Immune Thrombocytopenia     | Recruiting           | UNS                         | Allo | WJUCMS Cs | 18 Years to 60 Years | Phase 1 Phase 2 | 15  | 2019/7/10  |                           |
| Primary biliary cirrhosis      | NCT01440309 | Efficacy and Safety Study of Allogenic Mesenchymal Stem Cells for Patients With Refractory Primary Biliary Cirrhosis | Unknown status       | IV                          | Allo | BMMSCs    | 18 Years to 60 Years | Phase 1         | 20  | 2011/9/26  |                           |
| Primary Biliary Cirrhosis      | NCT01662973 | Umbilical Cord Mesenchymal Stem Cells for Patients With Primary Biliary Cirrhosis                                    | Unknown status       | IV                          | Allo | WJUCMS Cs | 18 Years to 65 Years | Phase 1 Phase 2 | 100 | 2012/8/13  |                           |
| Primary Biliary Cirrhosis      | NCT04522869 | Umbilical Cord Derived Mesenchymal Stem Cell (UC - MSC) Transplantation for Children Suffering From Biliary Atresia  | Recruiting           | Hepatic arterial injection  | Allo | WJUCMS Cs | 5 Months to 2 Years  | Phase 1 Phase 2 | 34  | 2020/8/21  |                           |
| Primary Sclerosing Cholangitis | NCT02997878 | A Single-arm,Phase IIa,Safety and Efficacy Trial of Selected MSCs in the Treatment of Patients With PSC & AiH        | Recruiting           | IV                          | Allo | WJUCMS Cs | 18 Years to 70 Years | Phase 1 Phase 2 | 56  | 2016/12/20 |                           |
| Severe Aplastic Anemia         | NCT02218437 | Treatment Protocol of Child SAA With the Injection of Mesenchymal Stem Cells (Umbilical Cord Derived) ,MSC-SAA"      | No Results Available | UNS                         | Allo | WJUCMS Cs | 1 Month to 18 Years  | Phase 4         | 20  | 2014/8/18  |                           |
| Primary Sjögren's Syndrome     | NCT00953485 | Allogeneic Mesenchymal Stem Cells Transplantation for Primary Sjögren's Syndrome (pSS)                               | Unknown status       | IV                          | Allo | BMMSCs    | 15 Years to 70 Years | Phase 1 Phase 2 | 20  | 2009/8/6   | Xu 2012 <sup>100</sup>    |
| Sjögren's Syndrome             | NCT04615455 | Mesenchymal Stem Cell Therapy of Dry Eye Disease in Patients With Sjögren's Syndrome                                 | Recruiting           | Transconjunctival injection | Allo | AdMSCs    | 18 Years and older   | Phase 2         | 40  | 2020/11/4  |                           |
| Systemic Sclerosis             | NCT00962923 | Allogeneic Mesenchymal Stem Cells Transplantation for Systemic Sclerosis (SSc)                                       | Unknown status       | IV                          | Allo | WJUCMS Cs | 15 Years to 65 Years | Phase 1 Phase 2 | 20  | 2009/8/20  | Zhang 2017 <sup>101</sup> |

|                    |             |                                                                                                                                           |                    |     |      |           |                      |                 |    |           |                                       |
|--------------------|-------------|-------------------------------------------------------------------------------------------------------------------------------------------|--------------------|-----|------|-----------|----------------------|-----------------|----|-----------|---------------------------------------|
| Systemic Sclerosis | NCT02213705 | Treatment of Refractory Severe Systemic Scleroderma by Injection of Allogeneic Mesenchymal Stem Cells                                     | Unknown status     | UNS | Allo | UNS       | 18 Years to 70 Years | Phase 1 Phase 2 | 20 | 2014/8/11 |                                       |
| Systemic Sclerosis | NCT03211793 | Mesenchymal Stromal Cells as Treatment for Digital Ulcers in Systemic Sclerosis                                                           | Not yet recruiting | IM  | Allo | BMMSCs    | 18 Years and older   | Phase 1 Phase 2 | 20 | 2017/7/7  | van Rhijn-Brouwer 2018 <sup>102</sup> |
| Systemic Sclerosis | NCT04356287 | Treatment With Human Umbilical Cord-derived Mesenchymal Stromal Cells in Systemic Sclerosis                                               | Not yet recruiting | IV  | Allo | WJUCMS Cs | 18 Years and older   | Phase 1 Phase 2 | 18 | 2020/4/22 |                                       |
| Systemic Sclerosis | NCT04432545 | Infusion of Allogeneic Mesenchymal Stem Cells in Patients With Diffuse Cutaneous Systemic Sclerosis With Refractory Pulmonary Involvement | Available          | IV  | Allo | WJUCMS Cs | 18 Years to 65 Years | Not Applicable  |    | 2020/6/16 |                                       |

Table S3: Clinical trials for OA using MSC-based products

| Conditions | NCT Number  | Title                                                                                                                                             | Status     | Delivery                    | Auto/Allo? | Source MSCs | Age                  | Phases          | Enrollment | First Posted | Publications              |
|------------|-------------|---------------------------------------------------------------------------------------------------------------------------------------------------|------------|-----------------------------|------------|-------------|----------------------|-----------------|------------|--------------|---------------------------|
| OA         | NCT02291926 | Human Umbilical Cord Mesenchymal Stem Cell Transplantation in Articular Cartilage Defect                                                          | Completed  | Intraarticular injection    | Allo       | WJUCMS Cs   | 18 Years to 75 Years | Phase 1         | 20         | 2014/11/17   |                           |
| OA         | NCT02237846 | Clinical Study of Umbilical Cord Tissue Mesenchymal Stem Cells (UC-MSC) for Treatment of Osteoarthritis                                           | Withdrawn  | Intraarticular injection/IV | Allo       | WJUCMS Cs   | 18 Years to 80 Years | Phase 1 Phase 2 | 0          | 2014/9/11    |                           |
| OA         | NCT02580695 | A Study to Assess Safety and Efficacy of Umbilical Cord-derived Mesenchymal Stromal Cells in Knee Osteoarthritis                                  | Completed  | Intraarticular injection    | Allo       | WJUCMS Cs   | 18 Years to 70 Years | Phase 1 Phase 2 | 30         | 2015/10/20   | Matas 2019 <sup>133</sup> |
| OA         | NCT04314661 | Comparative Effectiveness of Arthroscopy and Non-Arthroscopy Using Mesenchymal Stem Cell Therapy (MSCs) and Conditioned Medium for Osteoarthritis | Recruiting | Intraarticular injection    | Allo       | WJUCMS C-CM | 55 Years to 70 Years | Phase 1 Phase 2 | 15         | 2020/3/19    |                           |
| OA         | NCT03800810 | Implantation of Allogenic Mesenchymal Stem Cell From Umbilical Cord Blood for Osteoarthritis Management                                           | Recruiting | Intraarticular injection    | Allo       | WJUCMS Cs   | 30 Years to 80 Years | Early Phase 1   | 9          | 2019/1/11    |                           |
| OA         | NCT03810521 | Dose-escalation of Cellistem-OA in Patients With Knee Osteoarthritis                                                                              | Recruiting | Intraarticular injection    | Allo       | WJUCMS Cs   | 30 Years to 75 Years | Phase 1         | 24         | 2019/1/18    |                           |
| OA         | NCT03866330 | Wharton's Jelly-derived Mesenchymal Stem Cells in Osteoarthritis                                                                                  | Recruiting | Intraarticular injection    | Allo       | WJUCMS Cs   | 30 Years to 75 Years | Phase 1 Phase 2 | 100        | 2019/3/7     |                           |

|    |             |                                                                                                                             |                    |                          |      |             |                      |                                  |    |            |                                   |
|----|-------------|-----------------------------------------------------------------------------------------------------------------------------|--------------------|--------------------------|------|-------------|----------------------|----------------------------------|----|------------|-----------------------------------|
| OA | NCT03383081 | The Safety/Efficacy of Human Umbilical Cord Mesenchymal Stem Cells (19#iSCLife@-OA)Therapy for Patients With Osteoarthritis | Not yet recruiting | Intraarticular injection | Allo | WJUCMS Cs   | up to 70 Years       | Phase 2                          | 60 | 2017/12/26 |                                   |
| OA | NCT03166865 | Clinical Study of Umbilical Cord Mesenchymal Stem Cells (UC-MSC) for Treatment of Knee Osteoarthritis                       | Recruiting         | Intraarticular injection | Allo | WJUCMS Cs   | 30 Years to 70 Years | Phase 1 Phase 2                  | 60 | 2017/5/25  |                                   |
| OA | NCT03357770 | The Maximum Tolerated Dose of Mesenchymal Stem Cells From Umbilical Cord                                                    | Not yet recruiting | Intraarticular injection | Allo | WJUCMS Cs   | 18 Years to 75 Years | Not Applicable                   | 9  | 2017/11/30 |                                   |
| OA | NCT03358654 | Evaluating Safety and Efficacy of Mesenchymal Stem Cells From Umbilical Cord                                                | Not yet recruiting | Intraarticular injection | Allo | WJUCMS Cs   | 18 Years to 75 Years | evaluate the safety and efficacy | 9  | 2017/11/30 |                                   |
| OA | NCT02118519 | Mesenchymal Stem Cells in Knee Cartilage Injuries                                                                           | Completed          | Intraarticular injection | Auto | BMMSCs      | 40 Years to 68 Years | Phase 2                          | 13 | 2014/4/21  | Al-Najar 2017 <sup>121</sup>      |
| OA | NCT02162693 | Clinical Trial of Autologous Adipose Tissue-Derived Mesenchymal Progenitor Cells (MPCs) Therapy for Knee Osteoarthritis     | Completed          | Intraarticular injection | Auto | AdMSCs      | 18 Years to 70 Years | Phase 2                          | 53 | 2014/6/13  | Lu 2019 <sup>127</sup>            |
| OA | NCT02037204 | IMPACT: Safety and Feasibility of a Single-stage Procedure for Focal Cartilage Lesions of the Knee.                         | Completed          | On cartilage lesions     | Allo | Unspecified | 18 Years to 45 Years | Phase 1 Phase 2                  | 35 | 2014/1/15  |                                   |
| OA | NCT02658344 | Clinical Trial to Evaluate Efficacy and Safety of JOINTSTEM in Patients With Degenerative Arthritis                         | Completed          | UNS                      | Auto | AdMSCs      | 18 Years and older   | Phase 2                          | 24 | 2016/1/18  |                                   |
| OA | NCT02544802 | Mesenchymal Stem Cell Treatment for Primary Osteoarthritis Knee                                                             | Unknown status     | Intraarticular injection | Auto | AdMSCs      | 50 Years to 70 Years | Phase 1                          | 4  | 2015/9/9   |                                   |
| OA | NCT02351011 | Human Autologous MSCs for the Treatment of Mid to Late Stage Knee OA                                                        | Completed          | UNS                      | Auto | BMMSCs      | 40 Years to 65 Years | Phase 1 Phase 2                  | 12 | 2015/1/30  |                                   |
| OA | NCT02365142 | Treatment of Osteoarthritis by Intra-articular Injection of Bone Marrow Mesenchymal Stem Cells With Platelet Rich Plasma    | Unknown status     | Intraarticular injection | Auto | BMMSCs      | 40 Years to 80 Years | Phase 1 Phase 2                  | 38 | 2015/2/18  | Lamo-Espinosa 2020 <sup>123</sup> |
| OA | NCT01739504 | Autologous Adipose-Derived Stromal Cells Delivered Intra-articularly in Patients With Osteoarthritis.                       | Terminated         | Intraarticular injection | Auto | AdMSCs      | 18 Years to 80 Years | Assess the Safety and Effects    | 10 | 2012/12/3  |                                   |

|    |             |                                                                                                                        |                |                          |      |          |                      |                 |     |            |                                                                       |
|----|-------------|------------------------------------------------------------------------------------------------------------------------|----------------|--------------------------|------|----------|----------------------|-----------------|-----|------------|-----------------------------------------------------------------------|
| OA | NCT01809769 | Autologous Adipose Tissue Derived Mesenchymal Stem Cells Therapy for Patients With Knee Osteoarthritis                 | Completed      | Intraarticular injection | Auto | AdMSCs   | 40 Years to 70 Years | Phase 1 Phase 2 | 18  | 2013/3/13  | Song 2018 <sup>126</sup>                                              |
| OA | NCT01985633 | Mesenchymal Stem Cells Enhanced With PRP Versus PRP In OA Knee                                                         | Unknown status | Intraarticular injection | Auto | BMMSCs   | 40 Years to 75 Years | Phase 1 Phase 2 | 24  | 2013/11/15 |                                                                       |
| OA | NCT01504464 | The Effects of Intra-articular Injection of Mesenchymal Stem Cells in Knee Joint Osteoarthritis                        | Completed      | Intraarticular injection | Auto | BMMSCs   | 18 Years to 65 Years | Phase 2         | 40  | 2012/1/5   |                                                                       |
| OA | NCT01895413 | Autologous Bone Marrow Mesenchymal Stem Cells Transplantation for Articular Cartilage Defects Repair                   | Completed      | Intraarticular injection | Auto | BMMSCs   | 25 Years to 65 Years | Phase 1 Phase 2 | 10  | 2013/7/10  |                                                                       |
| OA | NCT01626677 | Follow-Up Study of CARTISTEM® Versus Microfracture for the Treatment of Knee Articular Cartilage Injury or Defect      | Completed      | UNS                      | Allo | UCBMS Cs | 18 Years and older   | Phase 3         | 103 | 2012/6/25  |                                                                       |
| OA | NCT02123368 | Treatment of Knee Osteoarthritis by Intra-articular Injection of Bone Marrow Mesenchymal Stem Cells                    | Completed      | Intraarticular injection | Auto | BMMSCs   | 50 Years to 80 Years | Phase 1 Phase 2 | 30  | 2014/4/25  | Lamo-Espinosa 2016 <sup>120</sup> , Lamo-Espinosa 2018 <sup>122</sup> |
| OA | NCT01586312 | Treatment of Knee Osteoarthritis With Allogenic Mesenchymal Stem Cells                                                 | Completed      | Intraarticular injection | Allo | BMMSCs   | 18 Years to 75 Years | Phase 1 Phase 2 | 30  | 2012/4/26  | Vega 2015 <sup>129</sup> , García-Sancho 2017 <sup>131</sup>          |
| OA | NCT01585857 | ADIPOA - Clinical Study                                                                                                | Completed      | Intraarticular injection | Auto | AdMSCs   | 50 Years to 75 Years | Phase 1         | 18  | 2012/4/26  | Pers 2016 <sup>124</sup>                                              |
| OA | NCT01453738 | Allogeneic Mesenchymal Stem Cells in Osteoarthritis                                                                    | Completed      | Intraarticular injection | Allo | BMMSCs   | 40 Years to 70 Years | Phase 2         | 60  | 2011/10/18 | Gupta 2016 <sup>130</sup>                                             |
| OA | NCT01448434 | Allogeneic Mesenchymal Stem Cells for Osteoarthritis                                                                   | Completed      | Intraarticular injection | Allo | UNS      | 20 Years to 70 Years | Phase 2         | 72  | 2011/10/7  |                                                                       |
| OA | NCT01459640 | Intra-Articular Autologous Bone Marrow Mesenchymal Stem Cells Transplantation to Treat Mild to Moderate Osteoarthritis | Unknown status | Intraarticular injection | Auto | BMMSCs   | 18 Years to 70 Years | Phase 2         | 50  | 2011/10/25 |                                                                       |

|    |                 |                                                                                                                           |                |                          |      |          |                      |                 |     |            |                              |
|----|-----------------|---------------------------------------------------------------------------------------------------------------------------|----------------|--------------------------|------|----------|----------------------|-----------------|-----|------------|------------------------------|
| OA | NCT01<br>227694 | Adult Stem Cell Therapy for Repairing Articular Cartilage in Gonarthrosis                                                 | Completed      | Intraarticular injection | Auto | BMMSCs   | 18 Years to 65 Years | Phase 1 Phase 2 | 15  | 2010/10/25 |                              |
| OA | NCT01<br>436058 | Side Effects of Autologous Mesenchymal Stem Cell Transplantation in Ankle Joint Osteoarthritis                            | Completed      | Intraarticular injection | Auto | BMMSCs   | 18 Years to 65 Years | Phase 1         | 6   | 2011/9/19  | Emadedin 2015 <sup>119</sup> |
| OA | NCT01<br>159899 | Transplantation of Bone Marrow Stem Cells Stimulated by Proteins Scaffold to Heal Defects Articular Cartilage of the Knee | Unknown status | Intraarticular injection | Auto | BMMSCs   | 30 Years to 75 Years | Early Phase 1   | 50  | 2010/7/12  |                              |
| OA | NCT01<br>499056 | Mesenchymal Stem Cell Transplantation in Osteoarthritis of Hip Joint                                                      | Completed      | Intraarticular injection | Auto | BMMSCs   | 18 Years to 65 Years | Phase 1         | 6   | 2011/12/26 | Emadedin 2015 <sup>119</sup> |
| OA | NCT01<br>183728 | Treatment of Knee Osteoarthritis With Autologous Mesenchymal Stem Cells                                                   | Completed      | Intraarticular injection | Auto | BMMSCs   | 18 Years to 76 Years | Phase 1 Phase 2 | 12  | 2010/8/18  |                              |
| OA | NCT01<br>207661 | Articular Cartilage Resurfacing With Mesenchymal Stem Cells In Osteoarthritis Of Knee Joint                               | Completed      | Intraarticular injection | Auto | BMMSCs   | 18 Years to 65 Years | Phase 1         | 6   | 2010/9/23  | Emadedin 2015 <sup>119</sup> |
| OA | NCT01<br>041001 | Study to Compare Efficacy and Safety of Cartistem and Microfracture in Patients With Knee Articular Cartilage Injury      | Completed      | UNS                      | Allo | UCBMS Cs | 18 Years and older   | Phase 3         | 104 | 2009/12/30 |                              |
| OA | NCT01<br>300598 | Autologous Adipose Tissue Derived Mesenchymal Stem Cells Transplantation in Patient With Degenerative Arthritis           | Completed      | Intraarticular injection | Auto | AdMSCs   | 18 Years to 75 Years | Phase 1 Phase 2 | 18  | 2011/2/21  | Jo 2017 <sup>125</sup>       |
| OA | NCT00<br>850187 | Autologous Transplantation of Mesenchymal Stem Cells (MSCs) and Scaffold in Full-thickness Articular Cartilage            | Completed      | UNS                      | Auto | BMMSCs   | 45 Years to 60 Years | Phase 1         | 6   | 2009/2/24  |                              |
| OA | NCT00<br>891501 | The Use of Autologous Bone Marrow Mesenchymal Stem Cells in the Treatment of Articular Cartilage Defects                  | Unknown status | Intraarticular injection | Auto | BMMSCs   | 15 Years to 55 Years | Phase 2 Phase 3 | 25  | 2009/5/1   |                              |
| OA | NCT02<br>674399 | A Phase 2 Study to Evaluate the Efficacy and Safety of JointStem in Treatment of Osteoarthritis                           | Completed      | UNS                      | Auto | AdMSCs   | 22 Years to 60 Years | Phase 2         | 28  | 2016/2/4   |                              |
| OA | NCT02<br>641860 | Clinical Trial of Allogenic Adipose Tissue-Derived Mesenchymal Progenitor Cells Therapy for Knee Osteoarthritis           | Completed      | Intraarticular injection | Allo | AdMSCs   | 18 Years to 70 Years | Phase 1         | 22  | 2015/12/30 | Zhao 2019 <sup>132</sup>     |

|    |             |                                                                                                                                                 |                         |     |           |                |                      |                 |     |           |                          |
|----|-------------|-------------------------------------------------------------------------------------------------------------------------------------------------|-------------------------|-----|-----------|----------------|----------------------|-----------------|-----|-----------|--------------------------|
| OA | NCT04368806 | A Phase 2b/3a Study to Evaluate the Efficacy and Safety of JointStem in Patients Diagnosed as Knee Osteoarthritis                               | Not yet recruiting      | UNS | Auto      | AdMSCs         | 18 Years and older   | Phase 2 Phase 3 | 140 | 2020/4/30 |                          |
| OA | NCT04448106 | Autologous Adipose Tissue-Derived Mesenchymal Stem Cells (AdMSCs) for Osteoarthritis                                                            | Not yet recruiting      |     | Auto      | AdMSCs         | 18 Years and older   | Phase 2         | 300 | 2020/6/25 |                          |
| OA | NCT04351932 | Bone Marrow Versus Adipose Autologous Mesenchymal Stem Cells for the Treatment of Knee Osteoarthritis                                           | Not yet recruiting      |     | UNS       | BMMSCs /AdMSCs | 18 Years to 70 Years | Phase 3         | 54  | 2020/4/17 |                          |
| OA | NCT04339504 | Follow-up Safety and Efficacy Evaluation on Subjects Who Completed Phase I Clinical Trial                                                       | Recruiting              |     | Allo      | UCBMS Cs       | 19 Years and older   | Phase 1         | 12  | 2020/4/9  |                          |
| OA | NCT04427930 | Follow-up Study for Participants of Jointstem Phase 3 Clinical Trial                                                                            | Enrolling by invitation | UNS | Auto      | AdMSCs         | 20 Years and older   | Phase 3         | 260 | 2020/6/11 |                          |
| OA | NCT04326985 | RCT Mesenchymal Stem Cells Versus Hyaluronic Acid in OA Knee):                                                                                  | Completed               |     | Auto      | UNS            | 18 Years to 65 Years | Early Phase 1   | 20  | 2020/3/30 |                          |
| OA | NCT02855073 | Clinical Trial to Compare ReJoinTM to Sodium Hyaluronate Injection for Knee Osteoarthritis Cartilage Defects                                    | Active, not recruiting  |     | Auto      | AdMSCs         | 18 Years to 70 Years | Phase 2         | 28  | 2016/8/4  | Qiao 2020 <sup>128</sup> |
| OA | NCT04453111 | Efficacy of Bone-marrow-derived and Placenta-derived Multipotent Mesenchymal Stem / Stromal Cells for Osteoarthritis                            | Recruiting              |     | Auto/Allo | BMMSCs /PMSCs  | 18 Years to 75 Years | Phase 1 Phase 2 | 45  | 2020/7/1  |                          |
| OA | NCT04043819 | Evaluation of Safety and Exploratory Efficacy of an Autologous Adipose-derived Cell Therapy Product for Treatment of Single Knee Osteoarthritis | Active, not recruiting  |     | Auto      | AdMSCs         | 18 Years to 80 Years | Phase 1         | 125 | 2019/8/2  |                          |
| OA | NCT03007576 | Treatment of Knee Osteoarthritis With Autologous Mesenchymal Stromal Cell Product (RegStem)                                                     | Completed               |     | Auto      | AdMSCs         | 50 Years to 75 Years | Phase 1         | 12  | 2017/1/2  |                          |
| OA | NCT02805855 | Autologous Culture Expanded Mesenchymal Stromal Cells for Knee Osteoarthritis                                                                   | Recruiting              | UNS | Auto      | AdMSCs         | 40 Years to 70 Years | Phase 1         | 24  | 2016/6/20 |                          |
| OA | NCT03943576 | Allogeneic Adipose Tissue-Derived Mesenchymal Stem Cells (GXPC1) for Knee Osteoarthritis                                                        | Recruiting              |     | Allo      | AdMSCs         | 40 Years to 80 Years | Phase 1 Phase 2 | 30  | 2019/5/9  |                          |

|    |             |                                                                                                                                        |                        |                          |      |           |                       |                                 |     |            |
|----|-------------|----------------------------------------------------------------------------------------------------------------------------------------|------------------------|--------------------------|------|-----------|-----------------------|---------------------------------|-----|------------|
| OA | NCT04240873 | Clinical Study of Intra Articular Injection of Catholic MASTER Cell (Bone Marrow Derived Mesenchymal Stem Cell) in Knee Osteoarthritis | Recruiting             | Intraarticular injection | UNS  | BMMSCs    | 20 Years to 80 Years  | Phase 1 Phase 2                 | 24  | 2020/1/27  |
| OA | NCT03164083 | The Effects of Stromal Vascular Fraction and Mesenchymal Stem Cells as Intra-articular Injection in Knee Joint Osteoarthritis          | Withdrawn              | Intraarticular injection | Auto | BMMSCs    | 25 Years to 65 Years  | Phase 2                         | 0   | 2017/5/23  |
| OA | NCT04037345 | Evaluate Safety and Explore Efficacy of SMUP-IA-01 in Patients With Knee Osteoarthritis                                                | Recruiting             | Intraarticular injection | Allo | UCBMS Cs  | 19 Years and older    | Phase 1                         | 12  | 2019/7/30  |
| OA | NCT03602872 | Safety of Allogeneic Bone Marrow Derived Mesenchymal Stem Cells in Subjects With Osteoarthritis                                        | Withdrawn              | Intraarticular injection | Allo | BMMSCs    | 35 Years to 65 Years  | Phase 1                         | 0   | 2018/7/27  |
| OA | NCT03969680 | Mesenchymal Stem Cell Transplantation for Osteoarthritis                                                                               | Recruiting             | Intraarticular injection | Auto | BMMSCs    | 40 Years to 70 Years  | explore the efficacy and safety | 60  | 2019/5/31  |
| OA | NCT03990805 | A Phase 3 Study to Evaluate the Efficacy and Safety of JointStem in Treatment of Osteoarthritis                                        | Active, not recruiting | Intraarticular injection | Auto | AdMSCs    | 20 Years to 100 Years | Phase 3                         | 260 | 2019/6/19  |
| OA | NCT03869229 | Adipose-derived Mesenchymal Stem Cells in Osteoarthritis                                                                               | Recruiting             | Intraarticular injection | Auto | AdMSCs    | 30 Years to 75 Years  | Phase 1 Phase 2                 | 100 | 2019/3/11  |
| OA | NCT04130100 | Clinical Study of Pulp Mesenchymal Stem Cells in the Treatment of Primary Mild to Moderate Knee Osteoarthritis                         | Recruiting             | Intraarticular injection | UNS  | DPMSCs    | 40 Years to 70 Years  | Early Phase 1                   | 60  | 2019/10/17 |
| OA | NCT03818737 | Multicenter Trial of Stem Cell Therapy for Osteoarthritis (MILES)                                                                      | Recruiting             | Intraarticular injection | Allo | WJUCMS Cs | 40 Years to 70 Years  | Phase 3                         | 480 | 2019/1/28  |
| OA | NCT03956719 | Treatment of Early Knee Osteoarthritis With Autologous Adipose-derived Mesenchymal Stem Cells                                          | Recruiting             | Intraarticular injection | Auto | AdMSCs    | 15 Years to 65 Years  | explore the efficacy and safety | 8   | 2019/5/21  |
| OA | NCT03477942 | Impact of Mesenchymal Stem Cells in Knee Osteoarthritis                                                                                | Recruiting             | Intraarticular injection | Auto | BMMSCs    | 18 Years to 60 Years  | Phase 1                         | 16  | 2018/3/27  |
| OA | NCT03955497 | Effectiveness of Autologous Adipose-derived Stem Cells in the Treatment of Knee Cartilage Injury                                       | Recruiting             | Intraarticular injection | Auto | AdMSCs    | 18 Years to 70 Years  | Phase 1 Phase 2                 | 30  | 2019/5/20  |

|    |                 |                                                                                                                                                                                                                          |                        |                          |      |                         |                      |                                  |     |            |
|----|-----------------|--------------------------------------------------------------------------------------------------------------------------------------------------------------------------------------------------------------------------|------------------------|--------------------------|------|-------------------------|----------------------|----------------------------------|-----|------------|
| OA | NCT03<br>589287 | Allogeneic Bone Marrow MSC Therapy for Knee Osteoarthritis                                                                                                                                                               | Recruiting             | Intraarticular injection | Allo | BMSCs                   | 40 Years and older   | Phase 1 Phase 2                  | 15  | 2018/7/17  |
| OA | NCT03<br>357575 | The Comparison of Efficacy and Safety of the Mesenchymal Stem Cells From Adipose and Hyaluronic Acid                                                                                                                     | Not yet recruiting     | Intraarticular injection | UNS  | AdMSCs                  | 18 Years to 75 Years | evaluate the efficacy and safety | 14  | 2017/11/30 |
| OA | NCT03<br>337243 | Effect of Implanting Allogenic Cytokines Derived From Human Amniotic Membrane (HAM) and Mesenchymal Stem Cells Derived From Human Umbilical Cord Wharton's Jelly (HUMCWJ) on Pain and Functioning of Knee Osteoarthritis | Completed              | Intraarticular injection | Allo | WJUCMS Cs/Amniotic MSCs | 50 Years to 85 Years | Not Applicable                   | 60  | 2017/11/8  |
| OA | NCT02<br>963727 | Use of Wharton Jelly Derived Mesenchymal Stem Cells for Knee Osteoarthritis                                                                                                                                              | Recruiting             | Intraarticular injection | Allo | WJUCMS Cs               | 42 Years to 75 Years | Phase 1                          | 10  | 2016/11/15 |
| OA | NCT02<br>966951 | Use of Adipose Tissue Derived Mesenchymal Stem Cells for Knee Osteoarthritis                                                                                                                                             | Recruiting             | Intraarticular injection | UNS  | AdMSCs                  | 42 Years to 75 Years | Phase 1                          | 10  | 2016/11/17 |
| OA | NCT03<br>028428 | Intra-articular Injection of MSCs in Treatment of Knee OA                                                                                                                                                                | Unknown status         | Intraarticular injection | Allo | PMSCs                   | 40 Years to 75 Years | Phase 2                          | 1   | 2017/1/23  |
| OA | NCT03<br>000712 | Investigator Initiated Trial to Evaluate the Efficacy and Safety of Intra-articular Injection of ADMSC Compared to Negative Control After High Tibial Osteotomy in the Osteoarthritis Patients.                          | Active, not recruiting | Intraarticular injection | Auto | AdMSCs                  | 20 Years to 80 Years | evaluate the efficacy and safety | 26  | 2016/12/22 |
| OA | NCT02<br>838069 | A Study Evaluating the Efficacy of a Single Injection Autologous Adipose Derived Mesenchymal Stromal Cells in Patients With Knee Osteoarthritis                                                                          | Recruiting             | Intraarticular injection | Auto | AdMSCs                  | 45 Years to 75 Years | Phase 2                          | 153 | 2016/7/20  |
| OA | NCT02<br>776943 | UCMSC Transplantation in the Treatment of Cartilage Damage                                                                                                                                                               | Unknown status         | Intraarticular injection | Allo | WJUCMS Cs               | 18 Years to 70 Years | Phase 1 Phase 2                  | 20  | 2016/5/18  |
| OA | NCT04<br>223622 | Effects of ASC Secretome on Human Osteochondral Explants                                                                                                                                                                 | Not yet recruiting     | Intraarticular injection | UNS  | AdMSC-secretome         | 18 Years and older   | Not Applicable                   | 24  | 2020/1/10  |



|    |                 |                                                                                                        |                     |                          |      |        |                           |                                 |     |            |
|----|-----------------|--------------------------------------------------------------------------------------------------------|---------------------|--------------------------|------|--------|---------------------------|---------------------------------|-----|------------|
| OA | NCT04<br>212728 | Treatment of Knee Osteoarthritis With Autologous Adipose-derived Mesenchymal Stem Cells                | Recruiting          | Intraarticular injection | Auto | AdMSCs | 40 Years to 70 Years      | explore the efficacy and safety | 60  | 2019/12/27 |
| OA | NCT04<br>604288 | Individual Patient Expanded Access IND of Autologous HB-asMSCS for the Treatment of Hip Osteoarthritis | No longer available | Intraarticular injection | Auto | AdMSCs | Child, Adult, Older Adult | Not Applicable                  |     | 2020/10/27 |
| OA | NCT04<br>208646 | Allogenic Adipose Tissue-Derived Mesenchymal Progenitor Cells for the Treatment of Knee Osteoarthritis | Not yet recruiting  | Intraarticular injection | Allo | AdMSCs | 40 Years to 75 Years      | Phase 2                         | 108 | 2019/12/23 |

Table S4: Clinical trials for pulmonary inflammation & COVID-19 using MSC-based products

| Conditions | NCT Number      | Title                                                                                                                  | Status         | Delivery | Auto/Allo? | Source MSCs | Age                  | Phases          | Enrollment | First Posted | Publications                                          |
|------------|-----------------|------------------------------------------------------------------------------------------------------------------------|----------------|----------|------------|-------------|----------------------|-----------------|------------|--------------|-------------------------------------------------------|
| ARDS       | NCT01<br>775774 | Human Mesenchymal Stem Cells For Acute Respiratory Distress Syndrome                                                   | Completed      | IV       | Allo       | BMMSCs      | 18 Years and older   | Phase 1         | 9          | 2013/1/25    | Liu 2014 <sup>140</sup> , Wilson 2015 <sup>137</sup>  |
| ARDS       | NCT01<br>902082 | Adipose-derived Mesenchymal Stem Cells in Acute Respiratory Distress Syndrome                                          | Unknown status | IV       | Allo       | AdMSCs      | 18 Years to 90 Years | Phase 1         | 20         | 2013/7/18    | Zheng 2014 <sup>136</sup>                             |
| ARDS       | NCT02<br>097641 | Human Mesenchymal Stromal Cells For Acute Respiratory Distress Syndrome (START)                                        | Completed      | IV       | Allo       | BMMSCs      | 18 Years and older   | Phase 2         | 60         | 2014/3/27    | Liu 2014 <sup>140</sup> , Matthay 2019 <sup>138</sup> |
| ARDS       | NCT02<br>112500 | Mesenchymal Stem Cell in Patients With Acute Severe Respiratory Failure                                                | Unknown status | IV       | Auto       | BMMSCs      | 20 Years to 80 Years | Phase 2         | 10         | 2014/4/14    |                                                       |
| ARDS       | NCT02<br>215811 | Treatment of Severe Acute Respiratory Distress Syndrome With Allogeneic Bone Marrow-derived Mesenchymal Stromal Cells  | Unknown status | UNS      | Allo       | BMMSCs      | 18 Years and older   | Phase 1         | 10         | 2014/8/13    |                                                       |
| ARDS       | NCT02<br>444455 | Human Umbilical-Cord-Derived Mesenchymal Stem Cell Therapy in Acute Lung Injury                                        | Unknown status | IV       | Allo       | WJUCMS Cs   | 35 Years to 70 Years | Phase 1 Phase 2 | 20         | 2015/5/14    |                                                       |
| ARDS       | NCT02<br>804945 | Mesenchymal Stem Cells (MSCs) for Treatment of Acute Respiratory Distress Syndrome (ARD) in Patients With Malignancies | Completed      | IV       | Allo       | BMMSCs      | 18 Years and older   | Phase 1         | 20         | 2016/6/17    |                                                       |
| ARDS       | NCT03<br>608592 | Human Umbilical Cord Mesenchymal Stem Cells (MSCs) Therapy in ARDS                                                     | Recruiting     | IV       | Allo       | WJUCMS Cs   | 18 Years and older   | Phase 1 Phase 2 | 26         | 2018/8/1     |                                                       |
| ARDS       | NCT03<br>818854 | Mesenchymal Stromal Cells For Acute Respiratory Distress Syndrome                                                      | Recruiting     | IV       | Allo       | BMMSCs      | 18 Years and older   | Phase 2         | 120        | 2019/1/28    |                                                       |

|        |             |                                                                                                                                                                                                                |                        |                    |      |                |                      |                 |     |            |                           |
|--------|-------------|----------------------------------------------------------------------------------------------------------------------------------------------------------------------------------------------------------------|------------------------|--------------------|------|----------------|----------------------|-----------------|-----|------------|---------------------------|
| ARDS   | NCT04282928 | Efficacy and Safety of Umbilical Cord Mesenchymal Stem Cells for the Treatment of Severe Viral Pneumonias                                                                                                      | Not yet recruiting     | IV                 | Allo | WJUCMS Cs      | 18 Years to 75 Years | Phase 1         | 40  | 2020/2/25  |                           |
| ARDS   | NCT04289194 | Clinical Study to Assess the Safety and Preliminary Efficacy of HCR040 in Acute Respiratory Distress Syndrome                                                                                                  | Active, not recruiting | IV                 | Allo | AdMSCs         | 18 Years and older   | Phase 1 Phase 2 | 26  | 2020/2/28  |                           |
| ARDS   | NCT04347967 | Mesenchymal Stem Cells for The Treatment of Acute Respiratory Distress Syndrome (ARDS)                                                                                                                         | Not yet recruiting     | IV                 | Allo | WJUCMS Cs      | 20 Years to 85 Years | Phase 1         | 18  | 2020/4/15  |                           |
| ARDS   | NCT04544215 | A Clinical Study of Mesenchymal Progenitor Cell Exosomes Nebulizer for the Treatment of Pulmonary Infection                                                                                                    | Recruiting             | Aerosol inhalation | Allo | AdMSC-exosomes | 18 Years to 75 Years | Phase 1 Phase 2 | 60  | 2020/9/10  |                           |
| ARDS   | NCT04602104 | A Clinical Study of Mesenchymal Stem Cell Exosomes Nebulizer for the Treatment of ARDS                                                                                                                         | Not yet recruiting     | Aerosol Inhalation | Allo | UNS- MSC-Exo   | 18 Years to 70 Years | Phase 1 Phase 2 | 169 | 2020/10/26 |                           |
| Asthma | NCT02192736 | Safety and Feasibility Study of Intranasal Mesenchymal Trophic Factor (MTF) for Treatment of Asthma                                                                                                            | Active, not recruiting | Intra-nasal        | Allo | WJUCMS Cs      | 21 Years to 60 Years | Phase 1 Phase 2 | 20  | 2014/7/17  |                           |
| Asthma | NCT03137199 | Allogeneic Human Cells (hMSC) Via Intravenous Delivery in Patients With Mild Asthma                                                                                                                            | Terminated             | IV                 | Allo | BMMSCs         | 18 Years to 65 Years | Phase 1         | 3   | 2017/5/2   |                           |
| COPD   | NCT00683722 | PROCHYMAL??(Human Adult Stem Cells) for the Treatment of Moderate to Severe Chronic Obstructive Pulmonary Disease (COPD)                                                                                       | Completed              | IV                 | Allo | BMMSCs         | 40 Years to 80 Years | Phase 2         | 62  | 2008/5/23  | Weiss 2013 <sup>141</sup> |
| COPD   | NCT01306513 | Safety and Feasibility Study of Administration of Mesenchymal Stemcells for Treatment of Emphysema                                                                                                             | Completed              | IV                 | Auto | BMMSCs         | 40 Years to 65 Years | Phase 1         | 10  | 2011/3/2   | Stolk 2016 <sup>142</sup> |
| COPD   | NCT01758055 | Safety Study of Endobronchial Transplantation of Autologous Mesenchymal Stem Cells (MSCs) in Emphysema Patients                                                                                                | Unknown status         | IT                 | Auto | BMMSCs         | 16 Years to 70 Years | Phase 1         | 12  | 2012/12/31 |                           |
| COPD   | NCT01849159 | Clinical Study of the Efficacy and Safety of the Application of Allogeneic Mesenchymal (Stromal) Cells of Bone Marrow, Cultured Under the Hypoxia in the Treatment of Patients With Severe Pulmonary Emphysema | Withdrawn              | IV                 | Allo | BMMSCs         | 35 Years to 75 Years | Phase 1 Phase 2 | 0   | 2013/5/8   |                           |
| COPD   | NCT01872624 | Safety Study of Bone-marrow Derived Mesenchymal Stromal Cells Associated With Endobronchial Valves in Emphysema                                                                                                | Completed              | IT                 | UNS  | BMMSCs         | 18 Years and older   | Phase 1         | 10  | 2013/6/7   |                           |
| COPD   | NCT02645305 | Adipose Derived Stem Cells Transplantation for Chronic Obstructive Pulmonary Disease                                                                                                                           | Unknown status         | IV                 | Auto | AdMSCs         | 40 Years to 80 Years | Phase 1 Phase 2 | 20  | 2016/1/1   |                           |

|          |             |                                                                                                                    |                    |     |      |             |                      |                 |     |            |                              |
|----------|-------------|--------------------------------------------------------------------------------------------------------------------|--------------------|-----|------|-------------|----------------------|-----------------|-----|------------|------------------------------|
| COPD     | NCT02749448 | Mesenchymal Stem Cells Therapy for Treatment of Airway Remodeling in Mustard Patients                              | Unknown status     | UNS | Auto | AdMSCs      | 45 Years to 65 Years | Phase 1         | 10  | 2016/4/25  | Marzouni 2020 <sup>143</sup> |
| COPD     | NCT04018729 | Cell Therapy Associated With Endobronchial Valve                                                                   | Not yet recruiting | IT  | UNS  | BMMSCs      | 18 Years and older   | Phase 2 Phase 3 | 34  | 2019/7/12  |                              |
| COPD     | NCT04206007 | Mesenchymal Stem Cells for The Treatment of Chronic Obstructive Pulmonary Disease                                  | Recruiting         | IV  | Allo | WJUCMS Cs   | 40 Years to 75 Years | Phase 1         | 9   | 2019/12/20 |                              |
| COPD     | NCT04433104 | Umbilical Cord Mesenchymal Stem Cells Transplantation in the Treatment of Chronic Obstructive Pulmonary Disease    | Recruiting         | IV  | Allo | WJUCMS Cs   | 40 Years and older   | Phase 1 Phase 2 | 40  | 2020/6/16  |                              |
| COPD     | NCT04047810 | Mesenchymal Stem Cells in the Treatment of Subjects With Advance Chronic Obstructive Pulmonary Disease (COPD)      | Recruiting         | IV  | UNS  | UNS         | 18 Years to 90 Years | Phase 1         | 15  | 2019/8/7   |                              |
| COVID-19 | NCT03042143 | Repair of Acute Respiratory Distress Syndrome by Stromal Cell Administration (REALIST) (COVID-19)                  | Recruiting         | IV  | Allo | WJUCMS Cs   | 16 Years and older   | Phase 1 Phase 2 | 75  | 2017/2/3   | Gorman 2020 <sup>146</sup>   |
| COVID-19 | NCT04252118 | Mesenchymal Stem Cell Treatment for Pneumonia Patients Infected With COVID-19                                      | Recruiting         | IV  | UNS  | Unspecified | 18 Years to 70 Years | Phase 1         | 20  | 2020/2/5   |                              |
| COVID-19 | NCT04269525 | Umbilical Cord(UC)-Derived Mesenchymal Stem Cells(MSCs) Treatment for the 2019-novel Coronavirus(nCOV) Pneumonia   | Recruiting         | IV  | Allo | WJUCMS Cs   | 18 Years to 80 Years | Phase 2         | 16  | 2020/2/13  |                              |
| COVID-19 | NCT04273646 | Study of Human Umbilical Cord Mesenchymal Stem Cells in the Treatment of Severe COVID-19                           | Not yet recruiting | IV  | Allo | WJUCMS Cs   | 18 Years to 65 Years | Not Applicable  | 48  | 2020/2/18  |                              |
| COVID-19 | NCT04288102 | Treatment With Human Umbilical Cord-derived Mesenchymal Stem Cells for Severe Corona Virus Disease 2019 (COVID-19) | Completed          | IV  | Allo | WJUCMS Cs   | 18 Years to 75 Years | Phase 2         | 100 | 2020/2/28  |                              |
| COVID-19 | NCT04315987 | NestaCell <sup>®</sup> Mesenchymal Stem Cell to Treat Patients With Severe COVID-19 Pneumonia                      | Not yet recruiting | IV  | UNS  | UNS         | 18 Years and older   | Phase 2         | 90  | 2020/3/20  |                              |
| COVID-19 | NCT04331613 | Safety and Efficacy of CAStem for Severe COVID-19 Associated With/Without ARDS                                     | Recruiting         | IV  | Allo | ESC-MSCs    | 18 Years to 70 Years | Phase 1 Phase 2 | 9   | 2020/4/2   |                              |
| COVID-19 | NCT04333368 | Cell Therapy Using Umbilical Cord-derived Mesenchymal Stromal Cells in SARS-CoV-2-related ARDS                     | Recruiting         | IV  | Allo | WJUCMS Cs   | 18 Years and older   | Phase 1 Phase 2 | 40  | 2020/4/3   |                              |
| COVID-19 | NCT04336254 | Safety and Efficacy Study of Allogeneic Human Dental Pulp Mesenchymal Stem Cells to Treat Severe COVID-19 Patients | Recruiting         | IV  | Allo | DPMSCs      | 18 Years to 65 Years | Phase 1 Phase 2 | 20  | 2020/4/7   | Ye 2020 <sup>147</sup>       |

|          |             |                                                                                                                                                                                                                    |                         |     |      |             |                           |                 |     |           |
|----------|-------------|--------------------------------------------------------------------------------------------------------------------------------------------------------------------------------------------------------------------|-------------------------|-----|------|-------------|---------------------------|-----------------|-----|-----------|
| COVID-19 | NCT04339660 | Clinical Research of Human Mesenchymal Stem Cells in the Treatment of COVID-19 Pneumonia                                                                                                                           | Recruiting              | IV  | Allo | WJUCMSCs    | 18 Years to 75 Years      | Phase 1 Phase 2 | 30  | 2020/4/9  |
| COVID-19 | NCT04341610 | ASC Therapy for Patients With Severe Respiratory COVID-19                                                                                                                                                          | Withdrawn               | UNS | Allo | AdMSCs      | 18 Years to 80 Years      | Phase 1 Phase 2 | 0   | 2020/4/10 |
| COVID-19 | NCT04345601 | Mesenchymal Stromal Cells for the Treatment of SARS-CoV-2 Induced Acute Respiratory Failure (COVID-19 Disease)                                                                                                     | Not yet recruiting      | IV  | Allo | BMMSCs      | 18 Years and older        | Early Phase 1   | 30  | 2020/4/14 |
| COVID-19 | NCT04346368 | Bone Marrow-Derived Mesenchymal Stem Cell Treatment for Severe Patients With Coronavirus Disease 2019 (COVID-19)                                                                                                   | Not yet recruiting      | IV  | UNS  | BMMSCs      | 18 Years to 75 Years      | Phase 1 Phase 2 | 20  | 2020/4/15 |
| COVID-19 | NCT04348435 | A Randomized, Double-Blind, Placebo-Controlled Clinical Trial to Determine the Safety and Efficacy of Hope Biosciences Allogeneic Mesenchymal Stem Cell Therapy (HB-adMSCs) to Provide Protection Against COVID-19 | Enrolling by invitation | IV  | Allo | AdMSCs      | Child, Adult, Older Adult | Phase 2         | 100 | 2020/4/16 |
| COVID-19 | NCT04348461 | BAttLe Against COVID-19 Using Mesenchymal Stromal Cells                                                                                                                                                            | Not yet recruiting      | IV  | Allo | AdMSCs      | 18 Years and older        | Phase 2         | 100 | 2020/4/16 |
| COVID-19 | NCT04349631 | A Clinical Trial to Determine the Safety and Efficacy of Hope Biosciences Autologous Mesenchymal Stem Cell Therapy (HB-adMSCs) to Provide Protection Against COVID-19                                              | Enrolling by invitation | IV  | Auto | AdMSCs      | Child, Adult, Older Adult | Phase 2         | 56  | 2020/4/16 |
| COVID-19 | NCT04352803 | Adipose Mesenchymal Cells for Abatement of SARS-CoV-2 Respiratory Compromise in COVID-19 Disease                                                                                                                   | Not yet recruiting      | IV  | Auto | AdMSCs      | 18 Years to 90 Years      | Phase 1         | 20  | 2020/4/20 |
| COVID-19 | NCT04355728 | Use of UC-MSCs for COVID-19 Patients                                                                                                                                                                               | Active, not recruiting  | IV  | Allo | WJUCMSCs    | 18 Years and older        | Phase 1 Phase 2 | 24  | 2020/4/21 |
| COVID-19 | NCT04361942 | Treatment of Severe COVID-19 Pneumonia With Allogeneic Mesenchymal Stromal Cells (COVID_MSVC)                                                                                                                      | Recruiting              | IV  | Allo | UNS         | 18 Years and older        | Phase 2         | 24  | 2020/4/24 |
| COVID-19 | NCT04362189 | Efficacy and Safety Study of Allogeneic HB-adMSCs for the Treatment of COVID-19                                                                                                                                    | Active, not recruiting  | IV  | Allo | AdMSCs      | Child, Adult, Older Adult | Phase 2         | 100 | 2020/4/24 |
| COVID-19 | NCT04366063 | Mesenchymal Stem Cell Therapy for SARS-CoV-2-related Acute Respiratory Distress Syndrome                                                                                                                           | Recruiting              | IV  | UNS  | UNS-MSC-Evs | 18 Years to 65 Years      | Phase 2 Phase 3 | 60  | 2020/4/28 |
| COVID-19 | NCT04366271 | Clinical Trial of Allogeneic Mesenchymal Cells From Umbilical Cord Tissue in Patients With COVID-19                                                                                                                | Recruiting              | IV  | Allo | WJUCMSCs    | 40 Years to 80 Years      | Phase 2         | 106 | 2020/4/28 |

|          |             |                                                                                                                                                                                                        |                         |    |      |           |                      |                 |     |           |
|----------|-------------|--------------------------------------------------------------------------------------------------------------------------------------------------------------------------------------------------------|-------------------------|----|------|-----------|----------------------|-----------------|-----|-----------|
| COVID-19 | NCT04366323 | Clinical Trial to Assess the Safety and Efficacy of Intravenous Administration of Allogeneic Adult Mesenchymal Stem Cells of Expanded Adipose Tissue in Patients With Severe Pneumonia Due to COVID-19 | Recruiting              | IV | Allo | AdMSCs    | 18 Years to 80 Years | Phase 1 Phase 2 | 26  | 2020/4/28 |
| COVID-19 | NCT04366830 | Intermediate-size Expanded Access Program (EAP), Mesenchymal Stromal Cells (MSC) for Acute Respiratory Distress Syndrome (ARDS) Due to COVID-19 Infection                                              | No longer available     | IV | Allo | BMMSCs    | 18 Years and older   | Phase 1 Phase 2 |     | 2020/4/29 |
| COVID-19 | NCT04367077 | MultiStem Administration for COVID-19 Induced ARDS (MACoVIA)                                                                                                                                           | Recruiting              | IV | Allo | BMMSCs    | 18 Years to 89 Years | Phase 2 Phase 3 | 400 | 2020/4/29 |
| COVID-19 | NCT04371393 | MSCs in COVID-19 ARDS                                                                                                                                                                                  | Recruiting              | IV | Allo | BMMSCs    | 18 Years and older   | Phase 3         | 300 | 2020/5/1  |
| COVID-19 | NCT04371601 | Safety and Effectiveness of Mesenchymal Stem Cells in the Treatment of Pneumonia of Coronavirus Disease 2019                                                                                           | Active, not recruiting  | IV | Allo | WJUCMS Cs | 18 Years to 70 Years | Early Phase 1   | 60  | 2020/5/1  |
| COVID-19 | NCT04377334 | Mesenchymal Stem Cells (MSCs) in Inflammation-Resolution Programs of Coronavirus Disease 2019 (COVID-19) Induced Acute Respiratory Distress Syndrome (ARDS)                                            | Not yet recruiting      | IV | Allo | BMMSCs    | 18 Years and older   | Phase 2         | 40  | 2020/5/6  |
| COVID-19 | NCT04382547 | Treatment of Covid-19 Associated Pneumonia With Allogenic Pooled Olfactory Mucosa-derived Mesenchymal Stem Cells                                                                                       | Enrolling by invitation | IV | Allo | OMMSCs    | 18 Years to 70 Years | Phase 1 Phase 2 | 40  | 2020/5/11 |
| COVID-19 | NCT04389450 | Double-Blind, Multicenter, Study to Evaluate the Efficacy of PLX PAD for the Treatment of COVID-19                                                                                                     | Recruiting              | IM | Allo | PMSCs     | 40 Years to 80 Years | Phase 2         | 140 | 2020/5/15 |
| COVID-19 | NCT04390139 | Efficacy and Safety Evaluation of Mesenchymal Stem Cells for the Treatment of Patients With Respiratory Distress Due to COVID-19                                                                       | Recruiting              | IV | Allo | WJUCMS Cs | 18 Years to 75 Years | Phase 1 Phase 2 | 30  | 2020/5/15 |
| COVID-19 | NCT04390152 | Safety and Efficacy of Intravenous Wharton's Jelly Derived Mesenchymal Stem Cells in Acute Respiratory Distress Syndrome Due to COVID 19                                                               | Not yet recruiting      | IV | Allo | WJUCMS Cs | 18 Years to 80 Years | Phase 1 Phase 2 | 40  | 2020/5/15 |
| COVID-19 | NCT04392778 | Clinical Use of Stem Cells for the Treatment of Covid-19                                                                                                                                               | Recruiting              | IV | Alo  | UNS       | 40 Years to 60 Years | Phase 1 Phase 2 | 30  | 2020/5/19 |

|          |             |                                                                                                                                                                                           |                        |     |      |                   |                      |                                |     |           |
|----------|-------------|-------------------------------------------------------------------------------------------------------------------------------------------------------------------------------------------|------------------------|-----|------|-------------------|----------------------|--------------------------------|-----|-----------|
| COVID-19 | NCT04397796 | Study of the Safety of Therapeutic Tx With Immunomodulatory MSC in Adults With COVID-19 Infection Requiring Mechanical Ventilation                                                        | Recruiting             | IV  | Allo | BMMSCs            | 18 Years to 80 Years | Phase 1                        | 45  | 2020/5/21 |
| COVID-19 | NCT04398303 | ACT-20 in Patients With Severe COVID-19 Pneumonia                                                                                                                                         | Not yet recruiting     | IV  | Allo | WJUCMS Cs/ MSC-CM | 18 Years to 85 Years | Phase 1 Phase 2                | 70  | 2020/5/21 |
| COVID-19 | NCT04399889 | hCT-MSCs for COVID19 ARDS                                                                                                                                                                 | Recruiting             | IV  | Allo | WJUCMS Cs         | 18 Years and older   | Phase 1 Phase 2                | 30  | 2020/5/22 |
| COVID-19 | NCT04400032 | Cellular Immuno-Therapy for COVID-19 Acute Respiratory Distress Syndrome - Vanguard                                                                                                       | Not yet recruiting     | IV  | Allo | BMMSCs            | 18 Years and older   | Phase 1                        | 9   | 2020/5/22 |
| COVID-19 | NCT04416139 | Mesenchymal Stem Cell for Acute Respiratory Distress Syndrome Due for COVID-19                                                                                                            | Recruiting             | IV  | Allo | WJUCMS Cs         | 18 Years and older   | Phase 2                        | 10  | 2020/6/4  |
| COVID-19 | NCT04428801 | Autologous Adipose-derived Stem Cells (AdMSCs) for COVID-19                                                                                                                               | Not yet recruiting     | IV  | Auto | AdMSCs            | 18 Years and older   | Phase 2                        | 200 | 2020/6/11 |
| COVID-19 | NCT04429763 | Safety and Efficacy of Mesenchymal Stem Cells in the Management of Severe COVID-19 Pneumonia                                                                                              | Not yet recruiting     | UNS | Allo | WJUCMS Cs         | 18 Years to 79 Years | Phase 2                        | 30  | 2020/6/12 |
| COVID-19 | NCT04444271 | Mesenchymal Stem Cell Infusion for COVID-19 Infection                                                                                                                                     | Recruiting             | IV  | Allo | BMMSCs            | 10 Years and older   | Phase 2                        | 20  | 2020/6/23 |
| COVID-19 | NCT04445454 | Mesenchymal Stromal Cell Therapy for Severe Covid-19 Infection                                                                                                                            | Recruiting             | IV  | Allo | BMMSCs            | 18 Years to 70 Years | Phase 1 Phase 2                | 20  | 2020/6/24 |
| COVID-19 | NCT04447833 | Mesenchymal Stromal Cell Therapy For The Treatment Of Acute Respiratory Distress Syndrome                                                                                                 | Recruiting             | IV  | Alo  | BMMSCs            | 18 Years to 65 Years | Phase 1                        | 9   | 2020/6/25 |
| COVID-19 | NCT04452097 | Use of hUC-MSC Product (BX-U001) for the Treatment of COVID-19 With ARDS                                                                                                                  | Not yet recruiting     | IV  | Allo | WJUCMS Cs         | 18 Years to 80 Years | Phase 1 Phase 2                | 39  | 2020/6/30 |
| COVID-19 | NCT04456361 | Use of Mesenchymal Stem Cells in Acute Respiratory Distress Syndrome Caused by COVID-19                                                                                                   | Active, not recruiting | IV  | Allo | WJUCMS Cs         | 18 Years and older   | Early Phase 1                  | 9   | 2020/7/2  |
| COVID-19 | NCT04456439 | Intermediate-size Expanded Access Program (EAP), Mesenchymal Stromal Cells (MSC) for Multisystem Inflammatory Syndrome in Children (MIS-C) Associated With Coronavirus Disease (COVID-19) | Available              | IV  | Allo | BMMSCs            | 2 Months to 17 Years | assess the safety and efficacy |     | 2020/7/2  |

|          |             |                                                                                                                                       |                    |                    |      |                |                           |                 |     |           |
|----------|-------------|---------------------------------------------------------------------------------------------------------------------------------------|--------------------|--------------------|------|----------------|---------------------------|-----------------|-----|-----------|
| COVID-19 | NCT04457609 | Administration of Allogenic UC-MSCs as Adjuvant Therapy for Critically-Ill COVID-19 Patients                                          | Recruiting         | IV                 | Allo | WJUCMS Cs      | 18 Years to 95 Years      | Phase 1         | 40  | 2020/7/7  |
| COVID-19 | NCT04461925 | Treatment of Coronavirus COVID-19 Pneumonia (Pathogen SARS-CoV-2) With Cryopreserved Allogenic P_MMSCs and UC-MMSCs                   | Recruiting         | IV                 | Allo | PMSCs          | 18 Years to 75 Years      | Phase 1 Phase 2 | 30  | 2020/7/8  |
| COVID-19 | NCT04466098 | Multiple Dosing of Mesenchymal Stromal Cells in Patients With ARDS (COVID-19)                                                         | Recruiting         | UNS                | UNS  | UNS            | 18 Years to 80 Years      | Phase 2         | 30  | 2020/7/10 |
| COVID-19 | NCT04467047 | Safety and Feasibility of Allogenic MSC in the Treatment of COVID-19                                                                  | Not yet recruiting | IV                 | Allo | UNS            | Child, Adult, Older Adult | Phase 1         | 10  | 2020/7/10 |
| COVID-19 | NCT04490486 | Umbilical Cord Tissue (UC) Derived Mesenchymal Stem Cells (MSCs) Versus Placebo to Treat Acute Pulmonary Inflammation Due to COVID-19 | Not yet recruiting | IV                 | Allo | WJUCMS Cs      | 18 Years and older        | Phase 1         | 21  | 2020/7/29 |
| COVID-19 | NCT04492501 | Investigational Treatments for COVID-19 in Tertiary Care Hospital of Pakistan                                                         | Completed          | UNS                | UNS  | BMMSCs         | 18 Years to 90 Years      | Not Applicable  | 600 | 2020/7/30 |
| COVID-19 | NCT04525378 | MSC-based Therapy in COVID-19-associated Acute Respiratory Distress Syndrome                                                          | Recruiting         | IV                 | UNS  | UNS            | 18 Years and older        | Phase 1         | 20  | 2020/8/25 |
| COVID-19 | NCT04527224 | Study to Evaluate the Efficacy and Safety of AstroStem-V in Treatment of COVID-19 Pneumonia                                           | Not yet recruiting | UNS                | Allo | AdMSCs         | 19 Years to 80 Years      | Phase 1 Phase 2 | 10  | 2020/8/26 |
| COVID-19 | NCT04535856 | Therapeutic Study to Evaluate the Safety and Efficacy of DW-MSC in COVID-19 Patients                                                  | Not yet recruiting | IV                 | Allo | UNS            | 19 Years and older        | Phase 1         | 9   | 2020/9/2  |
| COVID-19 | NCT04537351 | The MEseNchymal coviD-19 Trial: a Pilot Study to Investigate Early Efficacy of MSCs in Adults With COVID-19                           | Recruiting         | IV                 | Allo | iPSC-MSC       | 18 Years and older        | Phase 1 Phase 2 | 24  | 2020/9/3  |
| COVID-19 | NCT04276987 | A Pilot Clinical Study on Inhalation of Mesenchymal Stem Cells Exosomes Treating Severe Novel Coronavirus Pneumonia                   | Completed          | Aerosol inhalation | Allo | AdMSC-exosomes | 18 Years to 75 Years      | Phase 1         | 24  | 2020/2/19 |
| COVID-19 | NCT04293692 | Therapy for Pneumonia Patients Infected by 2019 Novel Coronavirus                                                                     | Withdrawn          | IV                 | Allo | WJUCMS Cs      | 18 Years to 75 Years      | Phase 1 Phase 2 | 0   | 2020/3/3  |
| COVID-19 | NCT04302519 | Novel Coronavirus Induced Severe Pneumonia Treated by Dental Pulp Mesenchymal Stem Cells                                              | Not yet recruiting | IV                 | UNS  | DPMSCs         | 18 Years to 75 Years      | Early Phase 1   | 24  | 2020/3/10 |
| COVID-19 | NCT04313322 | Treatment of COVID-19 Patients Using Wharton's Jelly-Mesenchymal Stem Cells                                                           | Recruiting         | IV                 | Allo | WJUCMS Cs      | 18 Years and older        | Phase 1         | 5   | 2020/3/18 |

|          |             |                                                                                                                                                           |                     |    |      |           |                                            |                 |     |            |                                     |
|----------|-------------|-----------------------------------------------------------------------------------------------------------------------------------------------------------|---------------------|----|------|-----------|--------------------------------------------|-----------------|-----|------------|-------------------------------------|
| COVID-19 | NCT04437823 | Efficacy of Intravenous Infusions of Stem Cells in the Treatment of COVID-19 Patients                                                                     | Recruiting          | IV | Allo | WJUCMS Cs | 30 Years to 70 Years                       | Phase 2         | 20  | 2020/6/18  |                                     |
| COVID-19 | NCT04629105 | Regenerative Medicine for COVID-19 and Flu-Elicited ARDS Using Longeveron Mesenchymal Stem Cells (LMSCs) (RECOVER)                                        | Recruiting          | IV | Allo | BMMSCs    | 18 Years and older                         | Phase 1         | 70  | 2020/11/16 |                                     |
| COVID-19 | NCT04625738 | Efficacy of Infusions of MSC From Wharton Jelly in the SARS-Cov-2 (COVID-19) Related Acute Respiratory Distress Syndrome                                  | Not yet recruiting  | IV | Allo | WJUCMS Cs | 18 Years and older                         | Phase 2         | 30  | 2020/11/12 |                                     |
| COVID-19 | NCT04611256 | Mesenchymal Stem Cells in Patients Diagnosed With COVID-19                                                                                                | Recruiting          | IV | UNS  | AdMSCs    | 18 Years to 65 Years                       | Phase 1         | 20  | 2020/11/2  |                                     |
| COVID-19 | NCT04573270 | Mesenchymal Stem Cells for the Treatment of COVID-19                                                                                                      | Completed           | IV | Allo | WJUCMS Cs | 18 Years and older                         | Phase 1         | 40  | 2020/10/5  |                                     |
| COVID-19 | NCT04565665 | Cord Blood-Derived Mesenchymal Stem Cells for the Treatment of COVID-19 Related Acute Respiratory Distress Syndrome                                       | Recruiting          | IV | Allo | UCBMS Cs  | 18 Years and older                         | Phase 1         | 70  | 2020/9/25  |                                     |
| COVID-19 | NCT04615429 | Clinical Trial to Assess the Efficacy of MSC in Patients With ARDS Due to COVID-19                                                                        | Recruiting          | IV | Allo | BMMSCs    | 18 Years and older                         | Phase 2         | 20  | 2020/11/4  | Payares-Herrera 2021 <sup>139</sup> |
| COVID-19 | NCT04753476 | Treatment of Severe COVID-19 Patients Using Secretome of Hypoxia-Mesenchymal Stem Cells in Indonesia                                                      | Recruiting          | IM | UNS  | UNS       | Child, Adult, Older Adult                  | Phase 2         | 48  | 2021/2/15  |                                     |
| COVID-19 | NCT04657458 | Expanded Access Protocol on Bone Marrow Mesenchymal Stem Cell Derived Extracellular Vesicle Infusion Treatment for Patients With COVID-19 Associated ARDS | Available           | IV | UNS  | BMMSCs    | 18 Years and older                         | Not Applicable  |     | 2020/12/8  |                                     |
| COVID-19 | NCT04728698 | Study of Intravenous Administration of Allogeneic Adipose-Derived Mesenchymal Stem Cells for COVID-19-Induced Acute Respiratory Distress                  | Not yet recruiting  | IV | Allo | AdMSCs    | 18 Years and older ?? (Adult, Older Adult) | Phase 2         | 100 | 2021/1/28  |                                     |
| COVID-19 | NCT04713878 | Mesenchymal Stem Cells Therapy in Patients With COVID-19 Pneumonia                                                                                        | Completed           | IV | UNS  | UNS       | 18 Years to 90 Years                       | Not Applicable  | 21  | 2021/1/19  |                                     |
| COVID-19 | NCT04780685 | A Phase II Study in Patients With Moderate to Severe ARDS Due to COVID-19                                                                                 | Recruiting          | IV | Allo | UNS       | 18 Years and older                         | Phase 2         | 40  | 2021/3/3   |                                     |
| COVID-19 | NCT04798066 | Intermediate Size Expanded Access Protocol Evaluating HB-adMSC's for the Treatment of Post-COVID-19 Syndrome                                              | No longer available | IV | Auto | AdMSCs    | 18 Years to 65 Years                       | Phase 1 Phase 2 |     | 2021/3/15  |                                     |



|                                 |             |                                                                                                                                     |                        |     |      |              |                      |                 |     |            |                               |
|---------------------------------|-------------|-------------------------------------------------------------------------------------------------------------------------------------|------------------------|-----|------|--------------|----------------------|-----------------|-----|------------|-------------------------------|
| COVID-19                        | NCT04798716 | The Use of Exosomes for the Treatment of Acute Respiratory Distress Syndrome or Novel Coronavirus Pneumonia Caused by COVID-19      | Not yet recruiting     | IV  | UNS  | UNS- MSC-Exo | 18 Years and older   | Phase 1 Phase 2 | 55  | 2021/3/15  |                               |
| IPF                             | NCT01385644 | A Study to Evaluate the Potential Role of Mesenchymal Stem Cells in the Treatment of Idiopathic Pulmonary Fibrosis                  | Completed              | IV  | Allo | PMSCs        | 40 Years to 80 Years | Phase 1         | 8   | 2011/6/30  |                               |
| IPF                             | NCT01919827 | Study of Autologous Mesenchymal Stem Cells to Treat Idiopathic Pulmonary Fibrosis                                                   | Completed              | IT  | Auto | BMMSCs       | 30 Years to 80 Years | Phase 1         | 17  | 2013/8/9   |                               |
| IPF                             | NCT02013700 | Allogeneic Human Cells (hMSC)in Patients With Idiopathic Pulmonary Fibrosis Via Intravenous Delivery (AETHER)                       | Completed              | IV  | Allo | BMMSCs       | 40 Years to 90 Years | Phase 1         | 9   | 2013/12/17 | Glassberg 2017 <sup>144</sup> |
| IPF                             | NCT02135380 | Evaluate Safety and Efficacy of Intravenous Autologous ADMSc for Treatment of Idiopathic Pulmonary Fibrosis                         | Unknown status         | IV  | Auto | AdMSCs       | 30 Years to 70 Years | Phase 1 Phase 2 | 60  | 2014/5/9   |                               |
| IPF                             | NCT02594839 | Safety and Efficacy of Allogeneic Mesenchymal Stem Cells in Patients With Rapidly Progressive Interstitial Lung Disease             | Completed              | IV  | Allo | BMMSCs       | 20 Years to 80 Years | Phase 1 Phase 2 | 20  | 2015/11/3  |                               |
| Allograft dysfunction           | NCT02709343 | Trial of Bone-marrow Derived Mesenchymal Stromal Cells (MSC) for New Onset Chronic Lung Allograft Dysfunction                       | Recruiting             | IV  | Allo | BMMSCs       | 18 Years and older   | Phase 2         | 82  | 2016/3/16  |                               |
| Bronchiectasis                  | NCT02625246 | Safety and Potential Efficacy of Human Mesenchymal Stem Cells in Non-Cystic Fibrosis Bronchiectasis                                 | Completed              | IV  | Allo | BMMSCs       | 30 Years to 87 Years | Phase 1         | 6   | 2015/12/9  |                               |
| Cystic Fibrosis                 | NCT02866721 | Safety and Tolerability Study of Allogeneic Mesenchymal Stem Cell Infusion in Adults With Cystic Fibrosis                           | Active, not recruiting | IV  | Allo | BMMSCs       | 18 Years and older   | Phase 1         | 14  | 2016/8/15  |                               |
| Cystic Fibrosis                 | NCT03058068 | Human Mesenchymal Stem Cells Infusion in Patients With Cystic Fibrosis                                                              | Withdrawn              | IV  | Allo | UNS          | 20 Years to 45 Years | Phase 1         | 0   | 2017/2/20  |                               |
| Idiopathic Pulmonary Hemorrhage | NCT02985346 | Efficacy of Bone Marrow Mesenchymal Stem Cell in Pulmonary Hemorrhage                                                               | Not yet recruiting     | UNS | UNS  | BMMSCs       | 1 Month to 18 Years  | Early Phase 1   | 100 | 2016/12/7  |                               |
| Interstitial Lung Disease       | NCT03929120 | Allogeneic Bone Marrow Mesenchymal Stem Cells for Patients With Interstitial Lung Disease (ILD) & Connective Tissue Disorders (CTD) | Recruiting             | IV  | Allo | BMMSCs       | 18 Years to 80 Years | Phase 1         | 10  | 2019/4/26  |                               |
| Interstitial Pulmonary Fibrosis | NCT03187431 | Role of Stem Cell Therapy in Interstitial Pulmonary Fibrosis                                                                        | Unknown status         | IV  | Auto | BMMSCs       | 18 Years to 65 Years | Phase 1         | 12  | 2017/6/15  |                               |

|                                      |             |                                                                                                                               |                |                    |      |                |                           |                 |    |            |                          |
|--------------------------------------|-------------|-------------------------------------------------------------------------------------------------------------------------------|----------------|--------------------|------|----------------|---------------------------|-----------------|----|------------|--------------------------|
| Lung injury                          | NCT02444858 | Human Umbilical-Cord-Derived Mesenchymal Stem Cell Therapy in Paraquat Poisoning Induced Lung Injury                          | Unknown status | IV                 | Allo | WJUCMS Cs      | 15 Years to 60 Years      | Phase 1 Phase 2 | 40 | 2015/5/15  |                          |
| Lung injury test in HD               | NCT04313647 | A Tolerance Clinical Study on Aerosol Inhalation of Mesenchymal Stem Cells Exosomes In Healthy Volunteers                     | Recruiting     | Aerosol inhalation | Allo | AdMSC-exosomes | 18 Years to 45 Years      | Phase 1         | 27 | 2020/3/18  |                          |
| Obliterative Bronchiolitis           | NCT0175655  | A Study to Evaluate the Potential of Mesenchymal Stromal Cells to Treat Obliterative Bronchiolitis After Lung Transplantation | Completed      | IV                 | Allo | UNS            | Child, Adult, Older Adult | Phase 1         | 10 | 2010/8/5   |                          |
| Obliterative Bronchiolitis           | NCT02181712 | Mesenchymal Stem Cell Therapy for Lung Rejection                                                                              | Recruiting     | IV                 | Allo | BMMSCs         | 18 Years to 75 Years      | Phase 1         | 19 | 2014/7/4   |                          |
| Obliterative Bronchiolitis           | NCT02543073 | MSC for Treatment of Interstitial Lung Disease After Allo-HSCT                                                                | Unknown status | IV                 | Allo | BMMSCs         | 18 Years to 65 Years      | Phase 1 Phase 2 | 60 | 2015/9/7   | Chen 2019 <sup>145</sup> |
| Pneumoconiosis                       | NCT02668068 | A Study on Pneumoconiosis Treated With Whole-lung Lavage Combined With Mesenchymal Stem Cells                                 | Completed      | Bronchial lavage   | Allo | WJUCMS Cs      | 18 Years to 70 Years      | Phase 1         | 80 | 2016/1/29  |                          |
| Pneumoconiosis                       | NCT02790762 | Human Umbilical Cord-Mesenchymal Stem Cells for Pneumoconiosis                                                                | Unknown status | IV                 | Allo | WJUCMS Cs      | 18 Years to 75 Years      | Phase 1         | 10 | 2016/6/6   |                          |
| Radiation-induced Pulmonary Fibrosis | NCT02277145 | A Study on Radiation-induced Pulmonary Fibrosis Treated With Clinical Grade Umbilical Cord Mesenchymal Stem Cells             | Completed      | IT                 | Allo | WJUCMS Cs      | 18 Years to 70 Years      | Phase 1         | 10 | 2014/10/28 |                          |

Table S5: Clinical trials for liver cirrhosis using MSC-based products

| Conditions | NCT Number  | Title                                                                                                             | Status         | Delivery       | Auto/Allo? | Source MSCs | Age                  | Phases          | Enrollment | First Posted | Publications |
|------------|-------------|-------------------------------------------------------------------------------------------------------------------|----------------|----------------|------------|-------------|----------------------|-----------------|------------|--------------|--------------|
| Cirrhosis  | NCT00476060 | Mesenchymal Stem Cell Transplantation in Decompensated Cirrhosis                                                  | Unknown status | IV             | Auto       | BMMSCs      | 18 Years to 65 Years | Phase 2         | 36         | 2007/5/21    |              |
| Cirrhosis  | NCT00976287 | Autologous Bone Marrow Mesenchymal Stem Cells Transplantation Via Hepatic Artery in Patients With Liver Cirrhosis | Unknown status | Hepatic artery | Auto       | BMMSCs      | 18 Years to 70 Years | Phase 2         | 50         | 2009/9/14    |              |
| Cirrhosis  | NCT00993941 | Bone Mesenchymal Stem Cell (BMSC) Transplantation in Liver Cirrhosis Via Portal Vein                              | Unknown status | IV             | Auto       | BMMSCs      | 18 Years to 60 Years | Phase 2         | 60         | 2009/10/14   |              |
| Cirrhosis  | NCT01220492 | Umbilical Cord Mesenchymal Stem Cells for Patients With Liver Cirrhosis                                           | Completed      | IV             | Allo       | WJUCMS Cs   | 18 Years to 65 Years | Phase 1 Phase 2 | 266        | 2010/10/14   |              |

|           |             |                                                                                                             |                |                            |      |           |                           |                 |     |            |
|-----------|-------------|-------------------------------------------------------------------------------------------------------------|----------------|----------------------------|------|-----------|---------------------------|-----------------|-----|------------|
| Cirrhosis | NCT01223664 | Allogenic Bone Marrow Stem Cells Transplantation in Patients With Liver Cirrhosis                           | Unknown status | Portal vein/Hepatic artery | Allo | BMMSCs    | 16 Years to 65 Years      | Phase 2         | 60  | 2010/10/19 |
| Cirrhosis | NCT01224327 | Umbilical Cord Mesenchymal Stem Cells Infusion Via Hepatic Artery in Cirrhosis Patients                     | Unknown status | Hepatic artery             | Allo | WJUCMS Cs | 18 Years to 70 Years      | Phase 1 Phase 2 | 50  | 2010/10/20 |
| Cirrhosis | NCT01233102 | Mesenchymal Stem Cells Treat Liver Cirrhosis                                                                | Suspended      | IV/Hepatic artery          | Allo | WJUCMS Cs | 18 Years to 70 Years      | Phase 1 Phase 2 | 200 | 2010/11/3  |
| Cirrhosis | NCT01342250 | Human Umbilical Cord Mesenchymal Stem Cells Transplantation for Patients With Decompensated Liver Cirrhosis | Completed      | UNS                        | Allo | WJUCMS Cs | 18 Years to 70 Years      | Phase 1 Phase 2 | 20  | 2011/4/27  |
| Cirrhosis | NCT01454336 | Transplantation of Autologous Mesenchymal Stem Cell in Decompensate Cirrhotic Patients With Pioglitazone    | Completed      | Portal vein                | Auto | BMMSCs    | 18 Years to 65 Years      | Phase 1         | 3   | 2011/10/19 |
| Cirrhosis | NCT01483248 | Human Menstrual Blood-derived Mesenchymal Stem Cells for Patients With Liver Cirrhosis                      | Unknown status | IV                         | Auto | MBMSCs    | 20 Years to 50 Years      | Phase 1 Phase 2 | 50  | 2011/12/1  |
| Cirrhosis | NCT01499459 | Autologous Mesenchymal Stem Cell Transplantation in Liver Cirrhosis                                         | Unknown status | IV                         | Auto | BMMSCs    | 18 Years to 80 Years      | Phase 2         | 25  | 2011/12/26 |
| Cirrhosis | NCT01573923 | Safety and Efficacy Study of Umbilical Mesenchymal Stem Cells for Liver Cirrhosis                           | Unknown status | IV                         | Allo | WJUCMS Cs | 30 Years to 60 Years      | Phase 1 Phase 2 | 320 | 2012/4/10  |
| Cirrhosis | NCT01591200 | Dose Finding Study to Assess Safety and Efficacy of Stem Cells in Liver Cirrhosis                           | Completed      | Hepatic artery             | Allo | BMMSCs    | 18 Years to 65 Years      | Phase 2         | 40  | 2012/5/3   |
| Cirrhosis | NCT01741090 | The Effectiveness and Safety for Mesenchymal Stem Cell for Alcoholic Liver Cirrhosis                        | Unknown status | UNS                        | Auto | BMMSCs    | 20 Years to 60 Years      | Phase 2         | 12  | 2012/12/4  |
| Cirrhosis | NCT01854125 | Autologous Mesenchymal Stem Cell Transplantation in Cirrhosis Patients With Refractory Ascites              | Unknown status | Hepatic artery             | Auto | BMMSCs    | 18 Years to 65 Years      | Phase 3         | 30  | 2013/5/15  |
| Cirrhosis | NCT02327832 | Safety Study of Liver Regeneration Therapy Using Cultured Autologous BMSCs                                  | Unknown status | IV                         | Auto | BMMSCs    | 20 Years to 75 Years      | Phase 1         | 10  | 2014/12/30 |
| Cirrhosis | NCT02652351 | Human Umbilical Cord-Mesenchymal Stem Cells for Hepatic Cirrhosis                                           | Unknown status | UNS                        | Allo | WJUCMS Cs | 18 Years to 80 Years      | Phase 1         | 20  | 2016/1/11  |
| Cirrhosis | NCT02943889 | Stem Cell Transplantation in Cirrhotic Patients                                                             | Unknown status | Portal vein                | Auto | BMMSCs    | Child, Adult, Older Adult | Phase 1 Phase 2 | 40  | 2016/10/25 |

|                     |             |                                                                                                                                  |                    |                   |           |                  |                      |                 |     |            |
|---------------------|-------------|----------------------------------------------------------------------------------------------------------------------------------|--------------------|-------------------|-----------|------------------|----------------------|-----------------|-----|------------|
| Cirrhosis           | NCT03460795 | Safety and Efficacy Study of Co-transferring of Mesenchymal Stem Cell and Regulatory T Cells in Treating End-stage Liver Disease | Not yet recruiting | UNS               | UNS       | UNS              | 18 Years to 65 Years | Phase 1 Phase 2 | 30  | 2018/3/9   |
| Cirrhosis           | NCT03529136 | Clinical Trial of Umbilical Cord Mesenchymal Stem Cell Transfusion in Decompensated Liver Cirrhosis                              | Unknown status     | IV                | Allo      | WJUCMS Cs        | 18 Years to 65 Years | Phase 2         | 252 | 2018/5/18  |
| Cirrhosis           | NCT03626090 | Mesenchymal Stem Cell Therapy for Liver Cirrhosis                                                                                | Recruiting         | IV                | Auto      | BMMSCs           | 21 Years to 69 Years | Phase 1 Phase 2 | 20  | 2018/8/10  |
| Cirrhosis           | NCT03945487 | Mesenchymal Stem Cells Treatment for Decompensated Liver Cirrhosis                                                               | Recruiting         | IV                | Allo      | WJUCMS Cs        | 18 Years to 69 Years | Phase 2         | 200 | 2019/5/10  |
| Cirrhosis           | NCT04243681 | Combination of Autologous MSC and HSC Infusion in Patients With Decompensated Cirrhosis                                          | Recruiting         | UNS               | Auto      | UNS              | 20 Years to 70 Years | Phase 4         | 5   | 2020/1/28  |
| Cirrhosis           | NCT03838250 | Study to Evaluate Hepatic Artery Injection of Autologous Human Bone Marrow-Derived MSCs in Patients With Alcoholic LC            | Recruiting         | Hepatic artery    | Auto      | BMMSCs           | 18 Years to 70 Years | Phase 1         | 10  | 2019/2/12  |
| Cirrhosis           | NCT01877759 | A Clinical Study to Evaluate the Safety and Efficacy of Mesenchymal Stem Cells in Liver Cirrhosis                                | Unknown status     | IV/Hepatic artery | Auto/Allo | BMMSCs /WJUCMSCs | 25 Years to 65 Years | Phase 1 Phase 2 | 20  | 2013/6/14  |
| Liver failure       | NCT01218464 | Safety and Efficacy of Human Mesenchymal Stem Cells for Treatment of Liver Failure                                               | Unknown status     | IV                | Allo      | WJUCMS Cs        | 18 Years to 70 Years | Phase 1 Phase 2 | 70  | 2010/10/11 |
| Liver failure       | NCT03629015 | Safety Study of Stemchymal® in Acute Liver Failure                                                                               | Not yet recruiting | IV                | Allo      | AdMSCs           | 20 Years to 70 Years | Phase 1         | 20  | 2018/8/14  |
| Liver failure       | NCT03668171 | Mesenchymal Stem Cell Transplantation for Acute-on-chronic Liver Failure                                                         | Recruiting         | IV                | UNS       | UNS              | 18 Years to 70 Years | Not Applicable  | 200 | 2018/9/12  |
| Liver failure       | NCT03860155 | Allogeneic ABCB5-positive Stem Cells for Treatment of Acute-on-Chronic Liver Failure                                             | Recruiting         | IV                | Allo      | Skin-MSCs        | 20 Years to 75 Years | Phase 1 Phase 2 | 18  | 2019/3/1   |
| Liver failure       | NCT03863002 | Safety and Efficacy of Mesenchymal Stem Cell Transplantation for Acute-on-Chronic Liver Failure                                  | Not yet recruiting | IV                | UNS       | UNS              | 16 Years to 60 Years | Phase 1 Phase 2 | 45  | 2019/3/5   |
| Hepatitis/Cirrhosis | NCT01728727 | Safety and Efficacy of Human Umbilical Cord Derived Mesenchymal Stem Cells for Treatment of HBV-related Liver Cirrhosis          | Unknown status     | Hepatic artery    | Allo      | WJUCMS Cs        | 18 Years to 65 Years | Phase 1 Phase 2 | 240 | 2012/11/20 |

|                         |             |                                                                                                                                       |                |     |      |                  |                      |                 |     |                                  |
|-------------------------|-------------|---------------------------------------------------------------------------------------------------------------------------------------|----------------|-----|------|------------------|----------------------|-----------------|-----|----------------------------------|
| Hepatitis/Cirrhosis     | NCT03826433 | Clinical Study of Human Umbilical Cord Mesenchymal Stem Cells (19#iSCLife@-LC)in the Treatment of Decompensated Hepatitis b Cirrhosis | Recruiting     | IV  | Allo | WJUCMSCs         | 18 Years to 60 Years | Phase 1         | 20  | 2019/2/1                         |
| Hepatitis/Cirrhosis     | NCT04357600 | Umbilical Cord Mesenchymal Stem Cell for Liver Cirrhosis Patient Caused by Hepatitis B                                                | Recruiting     | IV  | Allo | WJUCMSCs         | 18 Years to 65 Years | Phase 1 Phase 2 | 12  | 2020/4/22                        |
| Hepatitis/Cirrhosis     | NCT02705742 | Mesenchymal Stem Cells Transplantation for Liver Cirrhosis Due to HCV Hepatitis                                                       | Unknown status | IV  | Auto | AdMSCs           | 18 Years to 70 Years | Phase 1 Phase 2 | 5   | 2016/3/10                        |
| Hepatitis/Liver failure | NCT00956891 | Therapeutic Effects of Liver Failure Patients Caused by Chronic Hepatitis B After Autologous MSCs Transplantation                     | Completed      | UNS | Auto | BMMSCs           | 15 Years to 70 Years | Not Applicable  | 158 | 2009/8/11                        |
| Hepatitis/Liver failure | NCT01221454 | Allogenic Bone Marrow Stem Cell Transplantation in Liver Failure                                                                      | Unknown status | IV  | Allo | BMMSCS           | 16 Years to 65 Years | Phase 2         | 60  | 2010/10/15                       |
| Hepatitis/Liver failure | NCT01322906 | Allogeneic Bone Marrow Mesenchymal Stem Cells Transplantation in Patients With Liver Failure Caused by Hepatitis B Virus (HBV)        | Unknown status | IV  | Allo | BMMSCs           | 16 Years to 65 Years | Phase 2         | 120 | 2011/3/25                        |
| Hepatitis/Liver failure | NCT01724398 | Umbilical Cord Mesenchymal Stem Cells Transplantation Combined With Plasma Exchange for Patients With Liver Failure                   | Unknown status | IV  | Allo | WJUCMSCs         | 16 Years to 65 Years | Phase 1 Phase 2 | 120 | 2012/11/9 Xu 2019 <sup>159</sup> |
| Hepatitis/Liver failure | NCT02812121 | UC-MSC Infusion for HBV-Related Acute-on-Chronic Liver Failure                                                                        | Unknown status | IV  | Allo | UCBMS Cs         | 18 Years to 65 Years | Phase 2         | 261 | 2016/6/24                        |
| Hepatitis/Liver failure | NCT01844063 | Safety and Efficacy of Diverse Mesenchymal Stem Cells Transplantation for Liver Failure                                               | Unknown status | IV  | Allo | BMMSCs /WJUCMSCs | 18 Years to 65 Years | Phase 1 Phase 2 | 210 | 2013/5/1                         |

Table S6: Clinical trials for non-immune diseases using MSC-derived products

| Condition                       | NCT Number  | Title                                                                                              | Status         | Delivery    | Auto/Allo? | Source MSCs     | Age                  | Phase           | Enrollment | First Posted |
|---------------------------------|-------------|----------------------------------------------------------------------------------------------------|----------------|-------------|------------|-----------------|----------------------|-----------------|------------|--------------|
| Hypoxic-Ischemic Encephalopathy | NCT02854579 | Neural Progenitor Cell and Paracrine Factors to Treat Hypoxic Ischemic Encephalopathy              | Unknown status | Intrathecal | UNS        | UNS-MSC-CM      | up to 14 Days        | Not Applicable  | 120        | 2016/8/3     |
| Diabetic foot ulcers            | NCT02943486 | Mesenchymal Stromal Cell Derivatives in the Treatment of Chronic Diabetic Foot Ulcers Type 1 and 2 | Unknown status | Intradermic | UNS        | UNS-MSCs/MSC-CM | 40 Years to 80 Years | Phase 1 Phase 2 | 51         | 2016/10/24   |
| Acute ischemic stroke           | NCT03384433 | Allogenic Mesenchymal Stem Cell Derived Exosome in Patients With Acute Ischemic Stroke             | Completed      | IV          | Allo       | UNS-MSC-Exo     | 40 Years to 80 Years | Phase 1 Phase 2 | 5          | 2017/12/27   |

|                               |             |                                                                                                                                    |                    |                      |      |              |                      |                 |    |            |
|-------------------------------|-------------|------------------------------------------------------------------------------------------------------------------------------------|--------------------|----------------------|------|--------------|----------------------|-----------------|----|------------|
| Macular holes                 | NCT03437759 | MSC-Exos Promote Healing of MHs                                                                                                    | Recruiting         | Into vitreous cavity | Allo | WJUCMSC-Exo  | up to 80 Years       | Early Phase 1   | 44 | 2018/2/19  |
| Pancreatic cancer             | NCT03608631 | iExosomes in Treating Participants With Metastatic Pancreas Cancer With KrasG12D Mutation                                          | Not yet recruiting | IV                   | UNS  | UNS- MSC-Exo | 18 Years and older   | Phase 1         | 28 | 2018/8/1   |
| Androgenic alopecia           | NCT03676400 | Hair Growth Efficacy and Safety of NGF-574H in Adult With Androgenic Alopecia                                                      | Completed          | On hair              | Allo | WJUCMSC-CM   | 18 Years to 60 Years | Not Applicable  | 84 | 2018/9/18  |
| Residual burn wounds          | NCT04235296 | Mesenchymal Stem Cell Conditioned Medium-derived Pleiotropic Factor in Treating Residual Burn Wound                                | Recruiting         | On the wound         | UNS  | UNS- MSC-PF  | 6 Years to 60 Years  | Phase 1         | 30 | 2020/1/21  |
| Chronic wounds                | NCT04235868 | Mesenchymal Stem Cell-derived Pleiotropic Factor in Treating Non-healing Wounds                                                    | Recruiting         | On the wound         | UNS  | UNS- MSC-CM  | 18 Years to 75 Years | Phase 1         | 30 | 2020/1/22  |
| Cerebral palsy                | NCT04314687 | Stem Cell and Conditioned Medium for Cerebral Palsy                                                                                | Recruiting         | Intrathecal          | Allo | WJUCMSC-CM   | 6 Months to 3 Years  | Phase 1 Phase 2 | 78 | 2020/3/19  |
| Retinitis pigmentosa          | NCT04315025 | Safety Issues of Peribulbar Injection of UC-MSC in Patients With Retinitis Pigmentosa                                              | Completed          | Peribulbar           | Allo | WJUCMSC-CM   | 18 Years to 65 Years | Phase 1 Phase 2 | 18 | 2020/3/19  |
| Keloid scars                  | NCT04326959 | Implantation of Mesenchymal Stem Cell, Conditioned Medium, or Triamcinolone Acetonide for Keloid                                   | Not yet recruiting | Intraleision         | Allo | WJUCMSC-CM   | 18 Years to 55 Years | Phase 1 Phase 2 | 24 | 2020/3/30  |
| Multiple organ failure        | NCT04356300 | Exosome of Mesenchymal Stem Cells for Multiple Organ Dysfunction Syndrome After Surgical Repaire of Acute Type A Aortic Dissection | Not yet recruiting | IV                   | Allo | WJUCMSC-Exo  | 20 Years to 80 Years | Not Applicable  | 60 | 2020/4/22  |
| Alzheimer disease             | NCT04388982 | the Safety and the Efficacy Evaluation of Allogenic Adipose MSC-Exos in Patients With Alzheimer's Disease                          | Not yet recruiting | Nasal dripping       | Allo | AdMSC-Exo    | 50 Years and older   | Phase 1 Phase 2 | 9  | 2020/5/15  |
| Nasal trauma                  | NCT04536233 | Effects of MSCs Derived Pleiotropic Factors on Wound Healing in Endonasal Surgeries                                                | Not yet recruiting | On the wound         | UNS  | UNS- MSC-PF  | 18 Years to 60 Years | Phase 1         | 50 | 2020/9/2   |
| Chronic wounds                | NCT04538885 | Mesenchymal Stem Cell-derived Pleiotropic Factor in Treating Poorly Healed Wounds of Postoperative Incision                        | Not yet recruiting | On the wound         | UNS  | UNS- MSC-PF  | 18 Years to 75 Years | Phase 1         | 50 | 2020/9/4   |
| Amyotrophic lateral sclerosis | NCT04681118 | Expanded Access Protocol: Repeated Administration of Nurown (Autologous MSC-NTF Cells) for the Treatment of ALS                    | Available          | Intrathecal          | Auto | BMMSC-NF     | 18 Years to 63 Years | Not Applicable  |    | 2020/12/23 |
